# Supplementary material for: Effectiveness of physical activity interventions delivered or prompted by health professionals in primary care settings: systematic review and meta-analysis of randomised controlled trials
Source: PubMed Central journal article supplement (PMC8864760; doi:10.1136/bmj-2021-068465), 2022-02-23

## Supplementary material

### Search strategy (Sept 2020)

This search was devised and tested in Medline. It combines intervention (physical activity) and setting (primary care) terms with established randomised controlled trial filters.<sup>1</sup> No population restrictions were applied. The search was adapted for a range of datasets including bibliographic databases, both general and subject specific, alongside trial registries; conference proceedings; citation indexes and grey literature sources. The range of databases chosen to search is well balanced and tailored to the subject matter in order to provide good coverage in identification of relevant studies. Whilst several trial registries were searched, it was not possible to search WHO ICTRP at this time due to restricted access. No date limitations were included with the exception of SCIE where the dates were restricted to the last 10 years for purposes of manageability.

<sup>1</sup> MEDLINE Therapy Best balance filter based on: Haynes RB, Wilczynski NL. Optimal search strategies for retrieving scientifically strong studies of diagnosis from MEDLINE: analytical survey. *BMJ* 2004; **328**:1040-2.

### Additional screening information

Bibliomap, ClinicalTrial.GOV and Open Grey search results could not be uploaded to Covidence so were screened in Microsoft® Word with subsequent eligible full texts added to Covidence and duplicates removed. Google translate was used to translate full texts where required to determine eligibility.

### Databases:

#### MEDLINE and MEDLINE In-Process: 09/09/2020

- 1 Exercis\*.ti,ab.
- 2 exp exercise/ or exp physical exertion/ or exp physical fitness/
- 3 jog\*.ti,ab.
- 4 (physical\* adj3 (activ\* or fit\*)).ti,ab.
- 5 Aerobics.ti,ab.
- 6 swim\*.ti,ab.
- 7 gym\*.ti,ab.
- 8 sport\*.ti,ab.
- 9 workout.ti,ab.
- 10 skip\*.ti,ab.
- 11 calisthenics.ti,ab.
- 12 Step count\*.ti,ab.
- 13 e-Exercise.ti,ab.
- 14 PACE.ti,ab.
- 15 pedometer.ti,ab.
- 16 Bicyc\*.ti,ab.
- 17 Cycling.ti,ab.
- 18 (Social adj2 prescrib\*).ti,ab.
- 19 Parkrun.ti,ab.
- 20 Couch to 5k.ti,ab.
- 21 Danc\*.ti,ab.
- 22 or/1-21
- 23 (GP or general practi\* or family practi\*).ti,ab.
- 24 Family Practice/ or General Practitioners/
- 25 (Community adj2 health\*).ti,ab.
- 26 (CCG or PCN or clinical commissioning group\*).ti,ab.
- 27 ((Communit\* or primary) adj3 nurs\*).ti,ab.
- 28 exp community health nursing/ or public health nursing/
- 29 ((general or famil\* or primary) adj3 physician).ti,ab.
- 30 Care home.ti,ab.
- 31 Community Health Services/
- 32 (Primary care or primary health care).ti,ab.
- 33 PCG.ti,ab.
- 34 Primary Health Care/
- 35 ((General or famil\* or primary) adj3 doctor).ti,ab.
- 36 (practi\* adj2 nurse).ti,ab.
- 37 ((general or family or primary or communit\*) adj3 (physical therapist\* or physiotherapist\*)).ti,ab.
- 38 Physical Therapists/

39 or/23-38  
40 39 and 22  
41 (quasi adj2 (RCT or randomi?ed controlled trial)).ti,ab.  
42 randomi?ed controlled trial.pt.  
43 randomi?ed.ti,ab.  
44 placebo.ti,ab.  
45 41 or 42 or 43 or 44  
46 40 and 45

**PsycINFO: 09/09/2020**

1 Exercis\*.ti,ab.  
2 Exp exercise/or exp physical activity/ or exp physical fitness  
3 jog\*.ti,ab.  
4 (physical\* adj3 (activ\* or fit\*)).ti,ab.  
5 Aerobics.ti,ab.  
6 swim\*.ti,ab.  
7 gym\*.ti,ab.  
8 sport\*.ti,ab.  
9 workout.ti,ab.  
10 skip\*.ti,ab.  
11 calisthenics.ti,ab.  
12 Step count\*.ti,ab.  
13 e-Exercise.ti,ab.  
14 PACE.ti,ab.  
15 pedometer.ti,ab.  
16 Bicyc\*.ti,ab.  
17 Cycling.ti,ab.  
18 (Social adj2 prescrib\*).ti,ab.  
19 Parkrun.ti,ab.  
20 Couch to 5k.ti,ab.  
21 Danc\*.ti,ab.  
22 or/1-21  
23 (GP or general practi\* or family practi\*).ti,ab.  
24 Family Physicians/ or General Practitioners/  
25 (Community adj2 health\*).ti,ab.  
26 (CCG or PCN or clinical commissioning group\*).ti,ab.  
27 ((Communit\* or primary) adj3 nurs\*).ti,ab.  
28 Public Health Services Nurses/  
29 ((general or famil\* or primary) adj3 physician).ti,ab.  
30 Care home.ti,ab.  
31 Community Health/ or Community Services/  
32 (Primary care or primary health care).ti,ab.  
33 PCG.ti,ab.  
34 Primary Health Care/  
35 ((General or famil\* or primary) adj3 doctor).ti,ab.  
36 (practi\* adj2 nurse).ti,ab.  
37 ((general or family or primary or communit\*) adj3 (physical therapist\* or physiotherapist\*)).ti,ab.  
38 Physical Therapists/  
39 or/23-38  
40 39 and 22  
41 (quasi adj2 (RCT or randomi?ed controlled trial)).ti,ab.  
42 random:.tw.  
43 control:.tw.  
44 exp treatment/  
45 41 or 42 or 43 or 44  
46 40 and 45

**EMBASE: 10/09/2020**

1 Exercis\*.ti,ab.  
2 exp exercise/or exp physical activity/ or exp fitness

- 3 jog\*.ti,ab.
- 4 (physical\* adj3 (activ\* or fit\*)).ti,ab.
- 5 Aerobics.ti,ab.
- 6 swim\*.ti,ab.
- 7 gym\*.ti,ab.
- 8 sport\*.ti,ab.
- 9 workout.ti,ab.
- 10 skip\*.ti,ab.
- 11 calisthenics.ti,ab.
- 12 Step count\*.ti,ab.
- 13 e-Exercise.ti,ab.
- 14 PACE.ti,ab.
- 15 pedometer.ti,ab.
- 16 Bicyc\*.ti,ab.
- 17 Cycling.ti,ab.
- 18 (Social adj2 prescrib\*).ti,ab.
- 19 Parkrun.ti,ab.
- 20 Couch to 5k.ti,ab.
- 21 Danc\*.ti,ab.
- 22 or/1-21
- 23 (GP or general practi\* or family practi\*).ti,ab.
- 24 General practice/
- 25 (Community adj2 health\*).ti,ab.
- 26 (CCG or PCN or clinical commissioning group\*).ti,ab.
- 27 ((Communit\* or primary) adj3 nurs\*).ti,ab.
- 28 exp community health nursing/
- 29 ((general or famil\* or primary) adj3 physician).ti,ab.
- 30 Care home.ti,ab.
- 31 Community Health Services/
- 32 (Primary care or primary health care).ti,ab.
- 33 PCG.ti,ab.
- 34 Primary Health Care/
- 35 ((General or famil\* or primary) adj3 doctor).ti,ab.
- 36 (practi\* adj2 nurse).ti,ab.
- 37 ((general or family or primary or communit\*) adj3 (physical therapist\* or physiotherapist\*)).ti,ab.
- 38 Physiotherapist/ (Embase)
- 39 or/23-38
- 40 39 and 22
- 41 (quasi adj2 (RCT or randomi?ed controlled trial)).ti,ab.
- 42 random:.tw.
- 43 placebo:.tw.
- 44 double-blind:.tw.
- 45 41 or 42 or 43 or 44
- 46 40 and 45

**ASSIA: 11/09/2020**

(ab(Exercis\* OR jog\* OR physical activ\* OR physical fit\* OR aerobics OR swim\* OR gym\* OR sport\* OR workout OR calisthenics OR step count\* OR e-exercise OR PACE OR pedometer OR bicyc\* OR cycling OR social prescrib\* OR parkrun\* OR couch to 5k OR danc\*) OR ti(Exercis\* OR jog\* OR physical activ\* OR physical fit\* OR aerobics OR swim\* OR gym\* OR sport\* OR workout OR calisthenics OR step count\* OR e-exercise OR PACE OR pedometer OR bicyc\* OR cycling OR social prescrib\* OR parkrun\* OR couch to 5k OR danc\*) OR MAINSUBJECT.EXACT("Exercise") OR MAINSUBJECT.EXACT("Physical fitness")) AND (ti(community health\* OR CCG OR PCN OR clinical commissioning group\* OR communit\* nurs\* OR primary nurs\* OR general physician OR famil\* physician OR primary physician OR care home OR primary care OR primary health care OR PCG OR general doctor OR famil\* doctor OR primary doctor OR practi\* nurse OR physical therapist\* OR physiotherapist\*) OR ab(community health\* OR CCG OR PCN OR clinical commissioning group\* OR communit\* nurs\* OR primary nurs\* OR general physician OR famil\* physician OR primary physician OR care home OR primary care OR primary health care OR PCG OR general doctor OR famil\* doctor OR primary doctor OR practi\* nurse OR physical therapist\* OR physiotherapist\*) OR MAINSUBJECT.EXACT("Family physicians") OR MAINSUBJECT.EXACT("Community nursing") OR

MAINSUBJECT.EXACT("Community health care") OR MAINSUBJECT.EXACT("Primary care") OR MAINSUBJECT.EXACT("Physical therapists") AND (ab(randomi\*ed) OR ti(randomi\*ed) OR ab (placebo) OR ti (placebo) OR ti(RCT) or ab(RCT))

**Database: Cinahl : 16/09/2020**

S41 S34 AND S40  
S40 S35 OR S36 OR S37 OR S38 OR S39  
S39 PT clinical trial  
S38 (MH "Treatment Outcomes")  
S37 TI (randomi?ed) or AB (randomi?ed)  
S36 AB (quasi n2 (RCT or randomi\*ed controlled trial)  
S35 TI (quasi n2 (RCT or randomi\*ed controlled trial)  
S34 S11 AND S33  
S33 S12 OR S13 OR S14 OR S15 OR S16 OR S17 OR S18 OR S19 OR S20 OR S21 OR S22 OR S23 OR S24  
OR S25 OR S26 OR S27 OR S28 OR S29 OR S30 OR S31 OR S32  
S32 (MM "Physical Therapists")  
S31 AB (genera or famil\* or primary or communit\*) n3 (physical therapist\* or physiotherapist\*)  
S30 TI (general or famil\* or primary or communit\*) n3 (physical therapist\* or physiotherapist\*)  
S29 TI (practi\* n2 nurse) or AB (practi\* n2 nurse)  
S28 AB (General or famil\* or primary) n3 doctor  
S27 TI (General or famil\* or primary) n3 doctor  
S26 (MM "Primary Health Care")  
S25 TI (PCG) or AB (PCG)  
S24 TI (primary care or primary healthcare) or AB (primary care or primary healthcare)  
S23 (MM "Community Health Services+")  
S22 TI (Care home) or AB (Care home)  
S21 AB (general or famil\* or primary) n3 physician\*  
S20 TI (general or famil\* or primary) n3 physician\*  
S19 (MM "Community Health Nursing+")  
S18 AB (Communit\* or primary) n2 nurs\*)  
S17 TI (Communit\* or primary) n2 nurs\*)  
S16 TI (CCG or PCN or clinical commissioning group\*) or AB (CCG or PCN or clinical commissioning group\*)  
S15 TI (Community n2 health\*) or AB (Community n2 health\*)  
S14 (MM "Physicians, Family")  
S13 (MM "Family Practice")  
S12 TI (GP or general practi\* or family practi\*) or AB (GP or general practi\* or family practi\*)  
S11 S1 OR S2 OR S3 OR S4 OR S5 OR S6 OR S7 OR S8 OR S9 OR S10  
S10 TX couch to 5k  
S9 TI (Social n2 prescrib\*) or AB (Social n2 prescrib\*)  
S8 TI (Aerobics or swim or gym or sport\* or workout or skip\* or calisthenics\* or Step count\* or e-Exercise\* or  
PACE or pedometer or Bicyc\* or Cycling or Parkrun or Danc\*) or AB (Aerobics or swim or gym or sport\* or  
workout or skip\* or calisthenics\* or Step count\* or e-Exercise\* or PACE or pedometer or Bicyc\* or Cycling or  
Parkrun or Danc\*)  
S7 AB Physical\* N3 activ\*  
S6 TI Physical N3 activ\*  
S5 AB Physical\* N3 fit\*  
S4 TI Physical\* N3 fit\*  
S3 (MM "Physical Fitness+") OR (MM "Sports+")  
S2 (MM "Exercise+")  
S1 TI Exercis\* or AB Exercis\*

**SportDiscus: 16/9/2020**

S41 S34 AND S40  
S40 S35 OR S36 OR S37 OR S38 OR S39  
S39 PT clinical trial  
S38 (MH "Treatment Outcomes")  
S37 TI (randomi?ed) or AB (randomi?ed)  
S36 AB (quasi n2 (RCT or randomi\*ed controlled trial)  
S35 TI (quasi n2 (RCT or randomi\*ed controlled trial)  
S34 S11 AND S33

S33 S12 OR S13 OR S14 OR S15 OR S16 OR S17 OR S18 OR S19 OR S20 OR S21 OR S22 OR S23 OR S24 OR S25 OR S26 OR S27 OR S28 OR S29 OR S30 OR S31 OR S32  
S32 (MM "Physical Therapists")  
S31 AB (genera or famil\* or primary or communit\*) n3 (physical therapist\* or physiotherapist\*)  
S30 TI (general or famil\* or primary or communit\*) n3 (physical therapist\* or physiotherapist\*)  
S29 TI (practi\* n2 nurse) or AB (practi\* n2 nurse)  
S28 AB (General or famil\* or primary) n3 doctor  
S27 TI (General or famil\* or primary) n3 doctor  
S26 (MM "Primary Health Care")  
S25 TI (PCG) or AB (PCG)  
S24 TI (primary care or primary healthcare) or AB (primary care or primary healthcare)  
S23 (MM "Community Health Services+")  
S22 TI (Care home) or AB (Care home)  
S21 AB (general or famil\* or primary) n3 physician\*  
S20 TI (general or famil\* or primary) n3 physician\*  
S19 (MM "Community Health Nursing+")  
S18 AB (Communit\* or primary) n2 nurs\*  
S17 TI (Communit\* or primary) n2 nurs\*  
S16 TI (CCG or PCN or clinical commissioning group\*) or AB (CCG or PCN or clinical commissioning group\*)  
S15 TI (Community n2 health\*) or AB (Community n2 health\*)  
S14 (MM "Physicians, Family")  
S13 (MM "Family Practice")  
S12 TI (GP or general practi\* or family practi\*) or AB (GP or general practi\* or family practi\*)  
S11 S1 OR S2 OR S3 OR S4 OR S5 OR S6 OR S7 OR S8 OR S9 OR S10  
S10 TX couch to 5k  
S9 TI (Social n2 prescrib\*) or AB (Social n2 prescrib\*)  
S8 TI (Aerobics or swim or gym or sport\* or workout or skip\* or calisthenics\* or Step count\* or e-Exercise\* or PACE or pedometer or Bicyc\* or Cycling or Parkrun or Danc\*) or AB (Aerobics or swim or gym or sport\* or workout or skip\* or calisthenics\* or Step count\* or e-Exercise\* or PACE or pedometer or Bicyc\* or Cycling or Parkrun or Danc\*)  
S7 AB Physical\* N3 activ\*  
S6 TI Physical N3 activ\*  
S5 AB Physical\* N3 fit\*  
S4 TI Physical\* N3 fit\*  
S3 (MM "Physical Fitness+") OR (MM "Sports+")  
S2 (MM "Exercise+")  
S1 TI Exercis\* or AB Exercis\*

**Sports Medicine and Education Index (formally Physical Education Index): 18/09/2020**

(ab(Exercis\* OR jog\* OR physical activ\* OR physical fit\* OR aerobics OR swim\* OR gym\* OR sport\* OR workout OR calisthenics OR step count\* OR e-exercise OR PACE OR pedometer OR bicyc\* OR cycling OR social prescrib\* OR parkrun\* OR couch to 5k OR danc\*) OR ti(Exercis\* OR jog\* OR physical activ\* OR physical fit\* OR aerobics OR swim\* OR gym\* OR sport\* OR workout OR calisthenics OR step count\* OR e-exercise OR PACE OR pedometer OR bicyc\* OR cycling OR social prescrib\* OR parkrun\* OR couch to 5k OR danc\*) OR MAINSUBJECT.EXACT("Exercise") OR MAINSUBJECT.EXACT("Physical fitness")) AND (ti(community health\* OR CCG OR PCN OR clinical commissioning group\* OR communit\* nurs\* OR primary nurs\* OR general physician OR famil\* physician OR primary physician OR care home OR primary care OR primary health care OR PCG OR general doctor OR famil\* doctor OR primary doctor OR practi\* nurse OR physical therapist\* OR physiotherapist\*) OR ab(community health\* OR CCG OR PCN OR clinical commissioning group\* OR communit\* nurs\* OR primary nurs\* OR general physician OR famil\* physician OR primary physician OR care home OR primary care OR primary health care OR PCG OR general doctor OR famil\* doctor OR primary doctor OR practi\* nurse OR physical therapist\* OR physiotherapist\*) OR MAINSUBJECT.EXACT("Family physicians") OR MAINSUBJECT.EXACT("Community nursing") OR MAINSUBJECT.EXACT("Community health care") OR MAINSUBJECT.EXACT("Primary care") OR MAINSUBJECT.EXACT("Physical therapists")) AND (ab(randomi\*ed) OR ti(randomi\*ed) OR ab (placebo) or ti (placebo)) OR ti(RCT) or ab(RCT))

**PEDRO (Physiotherapy Evidence Database) : 18/09/2020**

(exercis\* and primary care) OR (fit\* and primary care OR (activ\* and primary care) OR (exercis\* and gp) OR (fit\* and gp) OR (activ\* and gp) OR (active\* and communit\* and health\* and service\*) OR (fit\* and

communit\* and health\* and service\*) OR (exercis\* and communit\* and health\* and service\*) OR (exercis\* and communit\* and nurs\*) OR (fit\* and communit\* and nurs\*) OR (activ\* and communit\* and nurs\* OR (physical activ aerobic primary) OR (fit\* activ aerobic primary) OR (exercis\* activ aerobic primary) OR (exercise aerobic primary)

**Bibliomap, EPPI CENTRE (Database of health promotion research): 18/09/2020**

Freetext: fit\* OR physical activit\* OR exercise

Limit by study type: RCT

**TRIALS REGISTRIES:**

**CT.gov: 23/10/2020**

Other terms: "primary care" AND "exercise"

Limits: Age: Adult & Older Adult Study type: Interventional

**EPPI CENTRE TRIALS REGISTRY: TROPHI: 15/09/2020**

- 1 What type of study does this report describe?: RCT
- 2 Freetext (All but Authors): exercise
- 3 Freetext (All but Authors): "physical activit\*"
- 4 Freetext (All but Authors): "primary care"
- 5 2 OR 3
- 6 1 AND 4 AND 5

**CENTRAL: 15/09/2020**

#1 ((Exercis\* OR physical activ\* OR physical fit\*) NEAR/5 aerobic\*):ti,ab,kw (Word variations have been searched)

#2 MeSH descriptor: [Exercise] explode all trees

#3 MeSH descriptor: [Physical Exertion] explode all trees

#4 MeSH descriptor: [Physical Fitness] explode all trees

#5 #1 or #2 or #3 or #4

**CONFERENCE PROCEEDINGS**

**Conference Proceedings Citation Index – Science (CPCI-S): 15/09/2020**

#8 #7 AND #3 AND #2

#7 #6 OR #1

# 6 #5 AND #4

# 5 TI= (Aerobic) OR AB =(Aerobic)

# 4 TI = (Exercis\* OR physical activ\* OR physical fit\*) OR AB =(Exercis\* or physical activ\* or physical fit\*)

# 3 ab=(randomi\*ed) OR ti=(randomi\*ed) OR ab =(placebo) OR ti =(placebo) OR ti=(RCT) or ab=(RCT)

# 2 ti=(community health\* OR CCG OR PCN OR clinical commissioning group\* OR communit\* nurs\* OR primary nurs\* OR general physician OR famil\* physician OR primary physician OR care home OR primary care OR primary health care OR PCG OR general doctor OR famil\* doctor OR primary doctor OR practi\* nurse OR physical therapist\* OR physiotherapist\*) OR ab=(community health\* OR CCG OR PCN OR clinical commissioning group\* OR communit\* nurs\* OR primary nurs\* OR general physician OR famil\* physician OR primary physician OR care home OR primary care OR primary health care OR PCG OR general doctor OR famil\* doctor OR primary doctor OR practi\* nurse OR physical therapist\* OR physiotherapist\*)

# 1 TI=(jog\* OR aerobics OR swim\* OR gym\* OR sport\* OR workout OR calisthenics OR step count\* OR e-exercise OR PACE OR pedometer OR bicyc\* OR cycling OR social prescrib\* OR parkrun\* OR couch to 5k OR danc\*) OR AB=(jog\* OR aerobics OR swim\* OR gym\* OR sport\* OR workout OR calisthenics OR step count\* OR e-exercise OR PACE OR pedometer OR bicyc\* OR cycling OR social prescrib\* OR parkrun\* OR couch to 5k OR danc\*)

**CITATION SEARCHING:**

**Science Citation Index – Expanded (SCI-E): 15/09/2020**

#8 #7 AND #3 AND #2 (limit years 2010-2020)

#7 #6 OR #1

# 6 #5 AND #4

# 5 TI= (Aerobic) OR AB =(Aerobic)

# 4 TI = (Exercis\* OR physical activ\* OR physical fit\*) OR AB =(Exercis\* or physical activ\* or physical fit\*)

# 3 ab=(randomi\*ed) OR ti=(randomi\*ed) OR ab =(placebo) OR ti =(placebo) OR ti=(RCT) or ab=(RCT)

# 2 ti=(community health\* OR CCG OR PCN OR clinical commissioning group\* OR communit\* nurs\* OR primary nurs\* OR general physician OR famil\* physician OR primary physician OR care home OR primary care OR primary health care OR PCG OR general doctor OR famil\* doctor OR primary doctor OR practi\* nurse OR physical therapist\* OR physiotherapist\*) OR ab=(community health\* OR CCG OR PCN OR clinical commissioning group\* OR communit\* nurs\* OR primary nurs\* OR general physician OR famil\* physician OR primary physician OR care home OR primary care OR primary health care OR PCG OR general doctor OR famil\* doctor OR primary doctor OR practi\* nurse OR physical therapist\* OR physiotherapist\*)

# 1 TI=(jog\* OR aerobics OR swim\* OR gym\* OR sport\* OR workout OR calisthenics OR step count\* OR e-exercise OR PACE OR pedometer OR bicyc\* OR cycling OR social prescrib\* OR parkrun\* OR couch to 5k OR danc\*) OR AB=(jog\* OR aerobics OR swim\* OR gym\* OR sport\* OR workout OR calisthenics OR step count\* OR e-exercise OR PACE OR pedometer OR bicyc\* OR cycling OR social prescrib\* OR parkrun\* OR couch to 5k OR danc\*)

## GREY LITERATURE:

### Open Grey: 21/09/2020

(Exercis\* OR physical activ\* OR physical fit\*) AND (community health\* OR CCG OR PCN OR clinical commissioning group\* OR communit\* nurs\* OR primary nurs\* OR general physician OR famil\* physician OR primary physician OR care home OR primary care OR primary health care OR PCG OR general doctor OR famil\* doctor OR primary doctor OR practi\* nurse OR physical therapist\* OR physiotherapist\*) AND (randomi\*ed OR placebo OR RCT)

### PubMed updated search (01/04/2021)

GP[Title/Abstract] OR ("General practi\*" [Title/Abstract]) OR ("family practi\*" [Title/Abstract]) OR (Family Practice[MeSH Terms]) OR (General practitioners[MeSH Terms]) OR (community health nursing[MeSH Terms]) OR (public health nursing[MeSH Terms]) OR (Community Health Services[MeSH Terms]) OR (Primary Health Care[MeSH Terms]) OR (Physical Therapists[MeSH Terms]) OR ("Community health\*" [Title/Abstract]) OR (CCG[Title/Abstract]) OR (PCN[Title/Abstract]) OR ("clinical commissioning group\*" [Title/Abstract]) OR (nurs\* [Title/Abstract]) OR (physician\* [Title/Abstract]) OR ("Care home" [Title/Abstract]) OR ("Primary care" [Title/Abstract]) OR ("Primary health care" [Title/Abstract]) OR ("Primary healthcare" [Title/Abstract]) OR (PCG[Title/Abstract]) OR (doctor\* [Title/Abstract]) OR (physical therapist\* [Title/Abstract]) OR (physiotherapist\* [Title/Abstract]) Filters: Clinical Trial, Randomized Controlled Trial, from 2020/6/1 - 2021/4/1

AND

(Exercise[Title/Abstract]) OR (exercise[MeSH Terms]) OR (physical exertion[MeSH Terms]) OR (jog[Title/Abstract]) OR ("physical activ\*" [Title/Abstract]) OR ("physical fit\*" [Title/Abstract]) OR (Aerobics[Title/Abstract]) OR (swim\* [Title/Abstract]) OR (gym[Title/Abstract]) OR (sport\* [Title/Abstract]) OR (workout[Title/Abstract]) OR (skip\* [Title/Abstract]) OR (calisthenics\* [Title/Abstract]) OR (step count\* [Title/Abstract]) OR (e-exercise[Title/Abstract]) OR (PACE[Title/Abstract]) OR (pedometer[Title/Abstract]) OR (bicyc\* [Title/Abstract]) OR (cycling[Title/Abstract]) OR ("social prescrib\*" [Title/Abstract]) OR (parkrun[Title/Abstract]) OR (Couch to 5k[Title/Abstract]) OR (Danc\* [Title/Abstract]) OR (gymnastic\* [Title/Abstract]) Filters: Clinical Trial, Randomized Controlled Trial, from 2020/6/1 - 2021/4/1

### Summary table of search results prior to duplication removal

| Source                          | Hits         |
|---------------------------------|--------------|
| ASSIA                           | 916          |
| CENTRAL                         | 3193         |
| CINAHL                          | 3665         |
| CPCI-S                          | 22           |
| CT                              | 799          |
| EMBASE                          | 6247         |
| MEDLINE AND MEDLINE IN PROGRESS | 2582         |
| PEDRO                           | 739          |
| PsychINFO                       | 2647         |
| SPORT DISCUS                    | 312          |
| SMEI                            | 1638         |
| SCI-E                           | 1876         |
| Open Grey                       | 9            |
| BIBLIOMAP, EPICENTRE            | 238          |
| TROPHI, EPICENTRE               | 161          |
| PubMed updated search           | 126          |
| <b>TOTALS</b>                   | <b>25170</b> |

## Additional information on data synthesis methods

MVPA minutes/day were multiplied by seven and MET minutes/week<sup>1</sup> were multiplied by the MET value to produce minutes/week to ensure all trials were expressed in the same units. Where trials had reported moderate and vigorous intensities of physical activity separately, only the value for moderate intensity physical activity was included. If the percentage of the number of participants meeting the guidance amount of MVPA was reported, these data were divided by 100 and multiplied by the number of participants in the trial group to derive the number of participants sufficiently physically active according to guidance used in the individual RCTs. Other MVPA measures including kilocalories, number of MVPA episodes, and ordinal scores of MVPA were excluded. Standard deviations (SDs) were calculated for studies reporting only CIs or standard errors (SEs) in RevMan. Where mean change in MVPA between baseline and follow-up was not reported, it was calculated by subtracting the follow-up mean from the baseline mean. The standard deviation of mean change was calculated using a standardised formula inputting a correlation coefficient of 0.31 for self-reported MVPA data, 0.6 for device-measures of MVPA and sedentary time,<sup>2</sup> 0.96 for weight and BMI.<sup>3</sup> Medians<sup>4,5</sup> with calculated SDs<sup>6</sup> and geometric means<sup>7</sup> were included where authors did not respond to requests for arithmetic means and sensitivity analyses were conducted to examine the effect (not pre-specified).

Where studies reported multiple follow-up points, data from the last follow-up were included in analyses. If studies reported data from both self-report and device-measures, only device-measured data were included in analyses. If there was more than one intervention group, the number of comparison participants was divided by the number of intervention groups and each intervention was analysed separately. In cluster randomised trials, clustering was accounted for by dividing the number of participants in each trial group by the design effect [ $1 + (M-1) \times ICC$ ]. Where the ICC was not reported, a value from a similar included study was used.<sup>8-13</sup> Heterogeneity was quantified using the  $I^2$  statistic with roughly 75-100% considered as high, 50-90% substantial, 30-60% moderate and 0-40% might not be important according to the Cochrane Handbook.<sup>14</sup>

## References

- 1 Craig CL, Marshall AL, Sjoström M, *et al.* International physical activity questionnaire: 12-country reliability and validity. *Med Sci Sports Exerc* 2003; 35: 1381–95.
- 2 Alonso-Domínguez R, Patino-Alonso MC, Sánchez-Aguadero N, García-Ortiz L, Recio-Rodríguez JI, Gómez-Marcos MA. Effect of a multifactorial intervention on the increase in physical activity in subjects with type 2 diabetes mellitus: a randomized clinical trial (EMID study). *Eur J Cardiovasc Nurs* 2019; 18: 399–409.
- 3 Jolly K, Lewis A, Beach J, *et al.* Comparison of range of commercial or primary care led weight reduction programmes with minimal intervention control for weight loss in obesity: Lighten Up randomised controlled trial. *Bmj* 2011; 343: d6500.
- 4 Lawton BA, Rose SB, Elley CR, Dowell AC, Fenton A, Moyes SA. Exercise on prescription for women aged 40-74 recruited through primary care: two year randomised controlled trial. *Bmj* 2008; 337: a2509.
- 5 Mitchell KE, Warrington V, Sewell L, *et al.* A randomised controlled trial of a self-management programme of activity coping and education-space for COPD: Impact on physical activity at 6 weeks. *Am J Respir Crit Care Med* 2013; 187: A5952.
- 6 Wan X, Wang W, Liu J, Tong T. Estimating the sample mean and standard deviation from the sample size, median, range and/or interquartile range. *BMC Med Res Methodol* 2014; 14: 1–13.
- 7 Hardeman W, Mitchell J, Pears S, *et al.* Evaluation of a very brief pedometer-based physical activity intervention delivered in NHS Health Checks in England: the VBI randomised controlled trial. *PLoS Med* 2020; 17: e1003046.
- 8 Grandes G, Sanchez A, Montoya I, Ortega Sanchez-Pinilla R, Torcal J, Group P. Two-year longitudinal analysis of a cluster randomized trial of physical activity promotion by general practitioners. *PLoS One*; 6: e18363.
- 9 Hesselink AE, Bilo HJG, Rutten GEH, *et al.* Effectiveness of an intervention in primary care to prevent type 2 diabetes in people with impaired fasting glucose, a cluster-randomised controlled trial. *Diabetologia* 2013; 56: S165.



- 10 Kloek CJJ, Bossen D, Spreeuwenberg PM, Dekker J, de Bakker DH, Veenhof C. Effectiveness of a blended physical therapist intervention in people with hip osteoarthritis, knee osteoarthritis, or both: a cluster-randomized controlled trial. *Phys Ther* 2018; 98: 560–70.
- 11 Elley C, Kerse N, Arroll B, Robinson E. Effectiveness of counselling patients on physical activity in general practice: Cluster randomised controlled trial. *BMJ Br Med J* 2003; 326: 793–8.
- 12 Westland H, Schuurmans MJ, Bos-Touwen ID, *et al.* Effectiveness of the nurse-led Activate intervention in patients at risk of cardiovascular disease in primary care: a cluster-randomised controlled trial. *Eur J Cardiovasc Nurs* 2020; 19: 721–31.
- 13 Yates T, Edwardson C, Henson J, *et al.* Walking Away from Type 2 diabetes: a cluster randomized controlled trial. *Diabet Med* 2017; 34: 698-707.
- 14 Higgins JPT, Thomas J, Chandler J, Cumpston M, Li T, Page MJ WV (editors). *Cochrane Handbook for Systematic Reviews of Interventions* version 6.2 (updated February 2021). 2021.

**Supplementary Table 1: Intervention details of included trials**

| <b>Study (year)</b>                  | <b>Intervention summary</b>                                                                                                                                                                                                                                                                                                                                                                                                                                                                                                                                                                                                                                                                                         | <b>Number of intervention contacts</b> | <b>Adherence to intervention</b>                                                               | <b>Comparison group summary</b>                                                                                                                                                                                                                            |
|--------------------------------------|---------------------------------------------------------------------------------------------------------------------------------------------------------------------------------------------------------------------------------------------------------------------------------------------------------------------------------------------------------------------------------------------------------------------------------------------------------------------------------------------------------------------------------------------------------------------------------------------------------------------------------------------------------------------------------------------------------------------|----------------------------------------|------------------------------------------------------------------------------------------------|------------------------------------------------------------------------------------------------------------------------------------------------------------------------------------------------------------------------------------------------------------|
| <b>Aittasalo (2006) Finland</b>      | PREX: Prescription-based counselling by physician including written prex (optional self-monitoring log, referral to other healthcare professionals). MON: self-monitoring (pedometer & log) & feedback from physiotherapist on 5-day recordings via mail.                                                                                                                                                                                                                                                                                                                                                                                                                                                           | 1                                      | Not reported.                                                                                  | Usual care.                                                                                                                                                                                                                                                |
| <b>Alonso-Dominguez (2019) Spain</b> | Effectiveness of a multifactorial intervention in diabetes (EMID): nurse PA & diet counselling with leaflet (10 mins: 5 mins PA + 5 mins diet), 5 nurse-guided group 4 km low/moderate intensity walks with 10 min warm-up and 10 min stretching after (once per week for 5 weeks), smartphone & EVIDENT II app (counts steps, PA log, advice) for 3 months, and diet workshop of 1 hour.                                                                                                                                                                                                                                                                                                                           | 7                                      | Not reported.                                                                                  | Usual care: standardised 10 min nurse PA and diet counselling with leaflet.                                                                                                                                                                                |
| <b>Apinaniz (2019) Spain</b>         | PA and diet health advice plus AKTIDIET smartphone app which included an aerobic exercise program & muscle training, record of food intake, videos of exercise, advice via text message once per day for first month then twice per week until 6 months.                                                                                                                                                                                                                                                                                                                                                                                                                                                            | 1                                      | Not reported.                                                                                  | Usual care: health advice on PA and diet which was also provided in writing.                                                                                                                                                                               |
| <b>Arija (2018) Spain</b>            | 9-month nurse & PA specialist supervised walking group of 396 METs/min/week over 120 min, in 2 sessions of 60 min (~5 km) with socio-cultural activities monthly.                                                                                                                                                                                                                                                                                                                                                                                                                                                                                                                                                   | 72                                     | Not reported.                                                                                  | Standard clinical care by the healthcare professionals                                                                                                                                                                                                     |
| <b>Carroll (2010) US</b>             | 4 computerized personalised feedback reports based on PA surveys completed via mail (0, 1, 3 & 6 months) and included a PA prescription which they took to next physician appointment to discuss.                                                                                                                                                                                                                                                                                                                                                                                                                                                                                                                   | 1                                      | 73% received the intervention materials and 87% reported reading all or most of the materials. | Identical procedures except questions were regarding preventive tests. The feedback reports contained information on recommended preventive tests and questions to ask their provider.                                                                     |
| <b>Cheng (2018) US</b>               | SUSTAIN (Systemic Use of STroke Averting INterventions): Delivered by nurse practitioners or physician assistant (care managers). Two 1 hour NP Clinic visits (1 month & 10 months) where content from group clinics is reinforced. Given report card on risk factors to take to future primary care provider visits. Blood pressure monitors & telephone care-coordinated calls started 1 week after discharge and between group and individual clinics with care manager (x5) & three 2 hour group clinics (2, 5 & 7 months) focused on stroke education, self-management including PA. After each group clinic, brief one-to-one sessions with care manager reinforced content individually and solved problems. | 10                                     | 56% attended at least 2 group clinics, 28% attended none.                                      | Usual care: mailed the American Heart Association brochure "Controlling Your Risk Factors: Our Guide to Reducing Your Risk of Heart Attack and Stroke." At least 1 scheduled appointment to the outpatient neurology clinic, followed by a plan to rapidly |

|                                        |                                                                                                                                                                                                                                                                                                                                                                                                                                                               |    |                               |  |                                                                                                                                                                                                                                                                                                     |
|----------------------------------------|---------------------------------------------------------------------------------------------------------------------------------------------------------------------------------------------------------------------------------------------------------------------------------------------------------------------------------------------------------------------------------------------------------------------------------------------------------------|----|-------------------------------|--|-----------------------------------------------------------------------------------------------------------------------------------------------------------------------------------------------------------------------------------------------------------------------------------------------------|
|                                        |                                                                                                                                                                                                                                                                                                                                                                                                                                                               |    |                               |  | transition care to a primary care provider.                                                                                                                                                                                                                                                         |
| <b>Clapperton (2020) Trinidad</b>      | Structured physician delivered counselling on PA, exercise prescription and follow-up phone call by physician 2 months later.                                                                                                                                                                                                                                                                                                                                 | 2  | Not reported.                 |  | Usual care from any doctor not participating the study.                                                                                                                                                                                                                                             |
| <b>Driehuis (2012) The Netherlands</b> | Groningen Overweight And Lifestyle study (GOAL): Tailored lifestyle counselling by nurse practitioner on PA and diet guided by a standardised computerised software programme for 3 years. 1st year: 4 individual counselling meetings (1, 2, 3 and 8 months) and 1 feedback consultation by phone (5 months) including pedometer & feedback. 2 <sup>nd</sup> & 3rd years: 1 meeting and 2 feedback calls per year with nurse.                                | 11 | Not reported.                 |  | Usual care: 1 GP 10 min consultation (discussed baseline measures).                                                                                                                                                                                                                                 |
| <b>Dubbert (2008) US</b>               | Counselling linked with primary care visits on home-based walking and 'strength exercise' (based on National Institute on Aging materials) with nurse at baseline, 1 month & 5 months. Recorded exercise on monthly calendars and received brief follow-up calls from nurse (3-5 mins, 1 week after visits) and automated motivational messages (once every 3-4 weeks). Fall prevention safety brochures and bimonthly newsletters throughout 10-month trial. | 6  | Not reported.                 |  | Discussion of their choice of health education topics with nurse at baseline, 1 & 5 months (if exercise was chosen then only the brochure's summary was advised- no goal setting, instructions or equipment). Fall prevention safety brochures and bimonthly newsletters throughout 10-month trial. |
| <b>Duijzer (2017) The Netherlands</b>  | SLIMMER: 38 sports lessons with primary care physiotherapist (plus dietary intervention of 6 individual consultations with a dietician & 1 group session with the aim to adopt a healthy dietary pattern). Maintenance phase at 10 months lasting up to 3 months: sports clinics at local sports club, concluding meetings with dietician and physiotherapist, and a return session with dietician, physiotherapist and the PA group.                         | 45 | Not reported.                 |  | Usual care and written materials on diet and PA.                                                                                                                                                                                                                                                    |
| <b>Dutton (2006) US</b>                | Physician delivered tailored weight loss intervention to promote PA. 6 monthly 15 min physician counselling visits (physicians were given protocols tailored to the visits), patients received summary handouts from physicians at each visit.                                                                                                                                                                                                                | 6  | Not reported.                 |  | Usual care for obesity management.                                                                                                                                                                                                                                                                  |
| <b>Elley (2003) New Zealand</b>        | Waikato Heart, Health & Activity Study/Green prescription programme: GP gave oral & written advice (green prescription) on PA during usual consultation and exercise specialists continued to support via telephone (at least 3 calls lasting 10-20 mins over 3 months using motivational interviewing) & post (quarterly newsletters). GP staff encouraged to feedback to participants at subsequent visits.                                                 | 4  | Not reported.                 |  | Usual care delivered by GPs. Offered intervention at the end of the study.                                                                                                                                                                                                                          |
| <b>Fortier (2011) Canada</b>           | The Physical Activity Counselling Trial (PAC): 2-4 mins brief PA counselling with physician and 6 sessions with PA counsellor in primary care over 3 months: 3 in person (60+40+40 mins) and 3 calls (20 mins each). Written goal sheet/action plan                                                                                                                                                                                                           | 7  | 81.7% attended all evaluation |  | Brief PA counselling (2-4 mins) with physician.                                                                                                                                                                                                                                                     |

|                                          |                                                                                                                                                                                                                                                                                                                                                                                                                                                                                                                                                                     |    |                                                                                      |                                                                                                       |
|------------------------------------------|---------------------------------------------------------------------------------------------------------------------------------------------------------------------------------------------------------------------------------------------------------------------------------------------------------------------------------------------------------------------------------------------------------------------------------------------------------------------------------------------------------------------------------------------------------------------|----|--------------------------------------------------------------------------------------|-------------------------------------------------------------------------------------------------------|
|                                          | after in-person sessions with self-monitoring sheet. Progress report filed in patient's chart halfway through. Healthcare practitioner encouragement letter at week 10.                                                                                                                                                                                                                                                                                                                                                                                             |    | visits (both groups).                                                                |                                                                                                       |
| <b>Garcia-Ortiz (2018) Spain</b>         | EVIDENT II: Counselling on PA & Mediterranean diet with research nurse (30 mins), leaflet and 15 min training session on smartphone app which included a log for diet & exercise (use for 3 months), daily report and plan for following days. Follow-up 1 week after to check app was being used correctly.                                                                                                                                                                                                                                                        | 3  | 56.8% had high app adherence, 28.2% used it for <1 month.                            | Brief counselling (30 mins) on PA and Mediterranean diet by research nurse and leaflets.              |
| <b>Goldstein (1999) US</b>               | The Physically Active for Life (PAL) project: brief physician-delivered PA counselling based on the Transtheoretical Model of Change and social learning theory. Researcher interviewed patient before seeing physician to establish motivational readiness for PA (6 mins). Physician Stage-matched counselling with written exercise prescription (5 mins) and manual. Follow-up with physician to discuss activity counselling (within 4 weeks of initial appointment) and new exercise prescription. Newsletter mailings (5x monthly mailings after follow-up). | 2  | Not reported.                                                                        | Usual care delivered by physician.                                                                    |
| <b>Gomez-Huelgas (2015) Spain</b>        | Multidisciplinary intervention in primary care (IMAP): 3-year trial of a dietary intervention and PA programme (home-based). 27 visits (9 medical and 18 nursing) with 6 visits in first 3 months then medical every 3 months during first year then every 6 months. Health assessment was 15 min. First 6 nursing visits were 30 mins then the rest were conducted in groups lasting 30 mins. A visit for individual nursing was every 6 months receiving a total of 11 individual and 7 other group visits.                                                       | 27 | Participants reported similar adherence to diet, PA and quality of life at baseline. | Usual care: 4 medical consultations and nurse visits (10 mins) on an annual basis.                    |
| <b>Grandes (2011) Spain</b>              | Experimental Programme for Physical activity promotion (PEPAF): Physician advice structured using web-based software and educational materials. 15 min appointment to prescribe a PA plan.                                                                                                                                                                                                                                                                                                                                                                          | 1  | Not reported.                                                                        | Usual care: physicians assessed patients' PA but delayed any intervention until the end of the study. |
| <b>Hall (2011) &amp; Morey (2009) US</b> | Project LIFE: Multicomponent PA counselling. One-time clinical endorsement by physician, initial brief assessment in person (counselling, resistance bands, exercise poster & workbook, pedometer), every other week for 6 weeks and then monthly telephone counselling by lifestyle counsellor averaging 18 mins (1-year duration). Monthly automated telephone messages from primary care provider, tailored report mailed quarterly. Quarterly tailored mailings of PA progress.                                                                                 | 15 | Not reported.                                                                        | Usual care from primary care providers.                                                               |
| <b>Harari (2008) UK</b>                  | Patients completed Health Risk Appraisal for Older Persons (HRA-O) questionnaire including PA assessment via mail. The results were uploaded to primary care provider database, a report was sent to the patient with materials, a 1-page report sent to the provider and attached to patient record. How the feedback was addressed was left up to the patient and provider.                                                                                                                                                                                       | 1  | Not reported.                                                                        | Usual care and sent health risk assessment questionnaire after the study.                             |

|                                         |                                                                                                                                                                                                                                                                                                                                                                                                                                                                                                                                                                                            |    |                                                                             |                                                                                                   |
|-----------------------------------------|--------------------------------------------------------------------------------------------------------------------------------------------------------------------------------------------------------------------------------------------------------------------------------------------------------------------------------------------------------------------------------------------------------------------------------------------------------------------------------------------------------------------------------------------------------------------------------------------|----|-----------------------------------------------------------------------------|---------------------------------------------------------------------------------------------------|
| <b>Hardeman (2020) UK</b>               | Step it up: Very brief pedometer intervention delivered by practitioner after NHS health check. 5 min face-to-face discussion, provision of pedometer, step chart for self-monitoring & booklet.                                                                                                                                                                                                                                                                                                                                                                                           | 1  | Not reported.                                                               | NHS health check only.                                                                            |
| <b>Harris (2012) Australia</b>          | Health Improvement & prevention study (HIPS): Health check with GP & practice nurse who provided brief lifestyle counselling then referred to lifestyle modification program if at high risk of CVD- visit with dietician/exercise specialist and group education programme CHANGE for HIPS ran by intervention officer: 4x 1.5 hours over 3 months then 2 follow-up sessions at 6- & 9-months including education, PA (20-30 mins walking/resistance exercise) and encouraged to use pedometer between sessions. Follow-up visit with GP 10-12 weeks later and follow-up 8-9 weeks after. | 9  | 30.5% of intervention patients attended the group program.                  | Usual care for their risk factors, including routine pharmacological management.                  |
| <b>Harris (2018) PACE-Lift) UK</b>      | 4 individually tailored PA consultations with primary care nurse over 3 months. These included a pedometer, PA feedback, counselling, PACE-Lift patient handbook, step-count diary and walking/PA plan.                                                                                                                                                                                                                                                                                                                                                                                    | 4  | 86% attended all nurse sessions.                                            | Usual care.                                                                                       |
| <b>Harris (2018) PACE-UP) UK</b>        | Nurse group: 12-week pedometer-based walking intervention delivered in 3 practice nurse PA consultations. Components: pedometer, individualised step-count/PA goals, patient handbook,                                                                                                                                                                                                                                                                                                                                                                                                     | 3  | 74% attended all nurse sessions, 81% sent PA diaries back with step-counts. | Usual PA and offered feedback, a pedometer, handbook and diary at the end of the trial.           |
| <b>Hellgren (2020) Sweden</b>           | Basic intervention: Information & brochures, offered free blood glucose test, telephone number for personal nurse support, PA prescription to see physiotherapist for advice, step-counter. Intensive: brief intervention plus 8 group PA sessions (6 in 6 months then 2 during following 6 months). Nurse, physiotherapist & nutritionist chaired the sessions. 2 additional groups sessions in year 2. 3rd year: telephone call every 3rd month. Groups were merged into one due to limited numbers and similar results.                                                                 | 16 | Not reported.                                                               | Usual care: information about the participant's condition was given & brochures on diet & PA.     |
| <b>Hesselink (2013) The Netherlands</b> | Road map towards diabetes prevention (RM): diagnosis of impaired fasting glucose by GP, motivational interviewing by practice nurse then 3 consultations in first 3 months followed by a consultation every 3 months. Referred to dietician, physiotherapist and/or local sports activities at nurse's discretion. 12-month duration.                                                                                                                                                                                                                                                      | 7  | 52% of both groups attended 5 or more consultations.                        | Usual care.                                                                                       |
| <b>Huebschmann (2018) US</b>            | Be Active programme: PA tracker (Fitbit), six 25 min counselling calls with clinic staff coach (Bachelors/Masters), and three 20 min in person clinician visits for safety monitoring.                                                                                                                                                                                                                                                                                                                                                                                                     | 9  | Not reported.                                                               | Enhanced usual care: printed PA materials & 3 monthly mailings on diet and other diabetes topics. |

|                                         |                                                                                                                                                                                                                                                                                                                                                                                                                                                                                                                                                                                                                     |   |                                                                                                                                                                    |                                                                                                                                                               |
|-----------------------------------------|---------------------------------------------------------------------------------------------------------------------------------------------------------------------------------------------------------------------------------------------------------------------------------------------------------------------------------------------------------------------------------------------------------------------------------------------------------------------------------------------------------------------------------------------------------------------------------------------------------------------|---|--------------------------------------------------------------------------------------------------------------------------------------------------------------------|---------------------------------------------------------------------------------------------------------------------------------------------------------------|
| <b>Jimmy (2005)<br/>Switzerland</b>     | Advice plus: feedback from practitioner on current stage of change related to PA level (2-10 mins), a stage specific leaflet and offered patient a counselling session (45 mins) with a PA specialist at a quarter of the usual price with 3- & 12-week phone reminders.                                                                                                                                                                                                                                                                                                                                            | 5 | 42% chose to take part in the counselling session.                                                                                                                 | Feedback from practitioner on current stage of change related to PA level and recommendation.                                                                 |
| <b>Jolly (2017)<br/>UK</b>              | Telephone health coaching intervention delivered by nurses to support self-management in relation to smoking, PA, medication management & action planning with supporting written documents, a pedometer, and self-monitoring diary. 4 sessions (1x 35-60 mins then 3x 15-20 mins) over 11 weeks, postal information at weeks 16 & 24. Baseline assessments by research nurse.                                                                                                                                                                                                                                      | 4 | 75.4% received all four calls.                                                                                                                                     | Usual care: standard COPD information leaflet about self-management.                                                                                          |
| <b>Kloek (2018)<br/>The Netherlands</b> | e-Exercise: 3-month intervention where 5 face-to-face physical therapy sessions with primary care physiotherapist were integrated with an online application consisting of graded activity, exercise, and information modules. Weekly emails reminders and automatic tailored feedback.                                                                                                                                                                                                                                                                                                                             | 5 | 81.1% were classified as adherent.                                                                                                                                 | Usual physiotherapy.                                                                                                                                          |
| <b>Lawton (2008)<br/>New Zealand</b>    | Green prescription: Brief PA motivational interviewing by nurse 7-13 mins with 6-month follow-up interview (counselling) with primary care nurse (30 mins) & monthly telephone counselling over 9 months by exercise facilitator (average of 5 calls of 15 mins each).                                                                                                                                                                                                                                                                                                                                              | 7 | Not reported.                                                                                                                                                      | Usual care.                                                                                                                                                   |
| <b>Migneault (2012)<br/>US</b>          | Telephone-Linked-Care: Culturally adapted to African American adults, automated computer-based telephone counselling to improve adherence to medication, diet and PA guidelines. Before randomisation: Health education study visit (in-home) by research assistants with manual, pedometer & scales plus a 20 min education session based on manual. After randomisation: blood pressure monitor and training on telephone system. 1 call per week for 32 weeks. Included at home measurements (pedometer, sphygmomanometer, scales). Summary data printouts were provided regularly to primary care practitioner. | 2 | 15% did not call the system, mean number of completed calls was 9 out of 32. 45.6% completed at least 1 PA module call and 49% of PA calls were completed overall. | Education only - Health education study visit (in-home) by research assistants with manual, pedometer & scales plus 20 min education session based on manual. |
| <b>Mitchell (2013)<br/>UK</b>           | SPACE FOR COPD: 6-week self-management programme of activity, coping & education. Structured around a 176-page workbook containing educational materials and a home exercise programme (daily walking programme & resistance training). Introduced to programme by primary care physiotherapist (30-45 mins) including motivational interviewing 2 telephone calls at weeks 2 & 4 (10 mins each).                                                                                                                                                                                                                   | 3 | Not reported.                                                                                                                                                      | Usual care for COPD management.                                                                                                                               |

|                                |                                                                                                                                                                                                                                                                                                                                                                                                                                                                                                                                                                               |    |                                                                                                                                             |                                                                                                                                 |
|--------------------------------|-------------------------------------------------------------------------------------------------------------------------------------------------------------------------------------------------------------------------------------------------------------------------------------------------------------------------------------------------------------------------------------------------------------------------------------------------------------------------------------------------------------------------------------------------------------------------------|----|---------------------------------------------------------------------------------------------------------------------------------------------|---------------------------------------------------------------------------------------------------------------------------------|
| <b>Moreno (2019)<br/>Spain</b> | Spanish Diabetes self-management programme (SDSMP): 6 weekly structured peer-to-peer workshops of 2.5 hours (once a week for 6 weeks) delivered by two leaders (one with diabetes/caregiver and one healthcare professional). The sessions were aimed at enabling participants to acquire knowledge and skills with a strong emphasis on healthier lifestyles including PA.                                                                                                                                                                                                   | 6  | 80% attended at least 4 sessions.                                                                                                           | Usual care by primary healthcare professional and education on diabetes is usually offered by the nurse on an individual basis. |
| <b>Morey (2012)<br/>US</b>     | Enhance fitness trial: 12-month, home-based multicomponent PA counselling program including one in-person baseline counselling session with trained counsellor, PA prescription and pedometer. Regular telephone counselling every 2 weeks for 6 weeks then monthly. Physician endorsement in clinic at next clinic visit with monthly automated encouragement from primary care provider via telephone, and customised mailed materials.                                                                                                                                     | 16 | Not reported.                                                                                                                               | Usual care: consultation in medical centre and weight management program (MOVE). Participant decided whether to engage or not.  |
| <b>Pears (2016)<br/>UK</b>     | 3 Very Brief Interventions delivered after NHS preventative health check in primary care by primary care nurse or health care assistants: Motivational-composed of 12 behaviour change techniques (BCTs) and included PA counselling, diary & booklet to set goals, make action plans and self-monitor PA. Pedometer- 7 BCTs and included a pedometer, recommendations based on 10,000 steps per day, step chart and booklet. Combined- 15 BCTs containing all the components of Motivational and Pedometer interventions.                                                    | 1  | Not reported.                                                                                                                               | Usual care: NHS preventative health check in primary care.                                                                      |
| <b>Pinto (2002)<br/>US</b>     | Fully automated PA counselling system (telephone-linked communication, TLC-PA) that was delivered via telephone. 1 home visit to train patients on the system by researcher. Participants were asked to call TLC every week for 1st 3 months then biweekly (10 mins per call). Reported pedometer readings during calls. Printed reports were sent monthly to participant & physician to facilitate integration of TLC-PA with the user's medical care, with the expectation that the reports would prompt the physician to reinforce the value of PA during a medical visit. | 1  | The mean number of calls to TLC-PA was 5.6 (SD=7.0). 33% did not call the system at all, 33% made 1-5 calls, 13% 6-10, 17% 11-20, 4% >20.   | Comparison group (TLC-Eat) received an automated intervention promoting healthy eating, which was also delivered via telephone. |
| <b>Pinto (2005)<br/>US</b>     | PAL2 (Physical Activity for Life 2): brief advice to exercise from a clinician (3-5 mins) supplemented by 3 face-to-face PA counselling sessions with health educator 0, 1 & 3 months (30-45 mins), PA prescriptions, 12 telephone-based counselling calls (weekly for 1st 3 months lasting 10-15 mins) and 12 PA tip sheets sent by mail at the same time as the counselling calls by health educators (research staff).                                                                                                                                                     | 16 | 100% attended the 1 <sup>st</sup> counselling session, 83% the 2 <sup>nd</sup> , 78% the 3 <sup>rd</sup> . 86% of the calls were delivered. | Brief advice (3-5 mins) from a clinician.                                                                                       |

|                                           |                                                                                                                                                                                                                                                                                                                                                                                                                                                                                                                                                                       |           |                                                                                                                                                                      |                                                                                                               |
|-------------------------------------------|-----------------------------------------------------------------------------------------------------------------------------------------------------------------------------------------------------------------------------------------------------------------------------------------------------------------------------------------------------------------------------------------------------------------------------------------------------------------------------------------------------------------------------------------------------------------------|-----------|----------------------------------------------------------------------------------------------------------------------------------------------------------------------|---------------------------------------------------------------------------------------------------------------|
| <b>Reed (2008)<br/>US</b>                 | Physicians and nurses delivered either 1) Counselling (6A's & PA prescription) & educational map illustrating all accessible recreational facilities within a 2-mile radius or 2) Counselling only.                                                                                                                                                                                                                                                                                                                                                                   | 1         | Not reported.                                                                                                                                                        | Usual care.                                                                                                   |
| <b>Richardson (2007)<br/>US</b>           | PA education information from physician of 3-5 mins either 1) verbal 2) written (brochure) 3) combination counselling both verbal and brochure. All participants received a pedometer and record calendar for 4 weeks.                                                                                                                                                                                                                                                                                                                                                | 1         | Not reported.                                                                                                                                                        | Usual care: pedometer and chart for 4 weeks only (no PA counselling from physician).                          |
| <b>Schillinger (2009)<br/>US</b>          | The Improving Diabetes Efforts Across Language and Literacy (IDEALL) project: Group 1) Interactive, weekly automated (pre-recorded) telephone calls over 39 weeks which took 6-10 mins for patient to complete. Self-management support with nurse follow-up call if needed (ATSM). Group 2) Monthly group medical visits with primary care physician and health educator facilitation lasting 90 mins each over 9 months (GMV) where PA was a component of self-care.                                                                                                | 9         | 94% completed $\geq 1$ ATSM call, mean number of calls completed was 21.9 of 39 delivered. 69% attended $\geq 1$ GMV, mean number attended was 4.8 out of 9 offered. | Usual care.                                                                                                   |
| <b>Stephoe (1999)<br/>UK</b>              | Change of Heart Study: Brief behavioural counselling, based on the stage of change model, carried out by practice nurses to reduce smoking and dietary fat intake and to increase regular physical activity. 3 sessions (patients with 2 risk factors) or 2 sessions (patients with 1 risk factor) of 20 mins counselling with nurse. Nurse called 1-2 times between sessions to consolidate and encourage.                                                                                                                                                           | 3, 4 or 5 | 90.2% attended $\geq 1$ counselling session, 72.8% attended 2, 55.7% attended 3.                                                                                     | Usual care: information provision & advice.                                                                   |
| <b>Taheri (2020)<br/>Qatar</b>            | Diabetes Intervention Accentuating Diet and Enhancing Metabolism (DIADEM-I): intensive lifestyle intervention including a total diet replacement phase (12 weeks), gradual food reintroduction combined with PA support phase (12 weeks) and a maintenance phase involving structured lifestyle support (6 months). Also had a wrist-worn accelerometer and directed to apps for monitoring. Saw physician at baseline and then every 3 months. Saw dietitians & personal trainers every 2 weeks for 6 months then attended the clinic once/month (1 hour per visit). | 22        | 67% of all possible visits were attended.                                                                                                                            | Usual medical diabetes care according to clinical guidelines.                                                 |
| <b>Tiessen (2013)<br/>The Netherlands</b> | SPRING study (Self-monitoring and Prevention of Risk factors by Nurse practitioners in the region of Groningen): Standard treatment plus pro-active intensive counselling with feedback on behaviours and self-monitoring (pedometer with step diary, weighing scale and/ or blood pressure device). At least 3 nurse                                                                                                                                                                                                                                                 | 6         | The mean number of visits was 4.9 (SD 2.2) with                                                                                                                      | Usual care by practice nurse: One single advice session & standard information leaflet from Dutch GP society. |



|                                                  |                                                                                                                                                                                                                                                                                                                                                                                                                                                                                                                                                                                                                                                                                                 |           |                                                                                                   |                                                                                                                                         |
|--------------------------------------------------|-------------------------------------------------------------------------------------------------------------------------------------------------------------------------------------------------------------------------------------------------------------------------------------------------------------------------------------------------------------------------------------------------------------------------------------------------------------------------------------------------------------------------------------------------------------------------------------------------------------------------------------------------------------------------------------------------|-----------|---------------------------------------------------------------------------------------------------|-----------------------------------------------------------------------------------------------------------------------------------------|
|                                                  | follow-ups at monthly intervals and then at 3-month intervals. 1 year study. Initial visit was 20 mins and follow-ups were adapted to patient preference.                                                                                                                                                                                                                                                                                                                                                                                                                                                                                                                                       |           | a median duration of 27 mins/visit.                                                               |                                                                                                                                         |
| <b>Valve (2013)<br/>Finland</b>                  | LINDA (Finnish expression “brief intervention for ladies”): (counselling on sexual health and contraception from the study nurses as part of the vaccination trial) plus 20-minute individualized lifestyle counselling session followed by further support at the six-monthly follow-up visits of the vaccination trial, in total for 1.5–2.5 years. Follow-up included brief counselling in a supportive manner and were 3-5 sessions depending on how long the patient had left in vaccination trial. The LINDA solution-focused brief therapy intervention focused on healthy physical activity, and dietary and sleeping behaviours, based on the needs and interests of the participants. | 4, 5 or 6 | 47% chose to discuss PA.                                                                          | Counselling on sexual health and contraception from the study nurses as part of the vaccination trial & standard lifestyle counselling. |
| <b>Van der Weegan (2015)<br/>The Netherlands</b> | Group 1) Tool+SSP: monitoring & feedback using an accelerometer linked to a smartphone and webserver (It's Life! Tool) and self-management support programme (SSP) consisting of visits with practice nurse 3-4 times for PA counselling in a 4–6-month period (20 mins) and materials. Group 2) SSP only.                                                                                                                                                                                                                                                                                                                                                                                      | 4         | Tool+SSP: 80% received a minimum of 3 consultations spread over at least 3 months. SSP only: 86%. | Usual care.                                                                                                                             |
| <b>Van Sluijs (2005)<br/>The Netherlands</b>     | Physician-based assessment and counselling for exercise (PACE): 10 min consultation offering advice based on PACE materials with GP or nurse, follow-up visit 4 weeks after with provider and PA counsellor calls at 2 weeks and 12 weeks.                                                                                                                                                                                                                                                                                                                                                                                                                                                      | 4         | Not reported.                                                                                     | Usual care: PA advice in 10 min consultation with provider.                                                                             |
| <b>Vermunt (2012)<br/>The Netherlands</b>        | Active Prevention in High Risk individuals Of Diabetes Type 2 in and around Eindhoven (APHRODITE) study: lifestyle counselling from the nurse practitioner and the general practitioner in 11 consultations of 20 mins over 2.5 years, 5 group meetings of 1 hour each to give more detailed information on diet and exercise conducted by trained dietitians (meetings 1, 2, 4, and 5) and physiotherapists (meeting 3), and a 1 hour personal consultation with the dietitian where dietary intake according to a 3-day food record was discussed, and suggestions were given for improvement.                                                                                                | 17        | Attendance at individual consultations ranged from 80-89% with GP and 86-97% with nurse.          | Usual care consisted of oral and written information about type 2 diabetes from GP.                                                     |
| <b>Volger (2013)<br/>US</b>                      | Practice-based Opportunities for Weight Reduction at the University of Pennsylvania (POWER-UP): Group 1) Brief Lifestyle Counselling: quarterly primary care provider visits (5-7 mins) plus monthly lifestyle counselling sessions about behavioural weight control with medical assistant (10-15 mins). Group 2)                                                                                                                                                                                                                                                                                                                                                                              | 32        | 2-year attendance rates for brief: 71.8±28.6% &                                                   | Usual Care: quarterly primary care provider visits that included education on diet and exercise (5-7 mins).                             |

|                                                                                      |                                                                                                                                                                                                                                                                                                                                                                                                                                                                                                                                                                                                                                                                                     |        |                                                                                                                                                  |                                                                                                                                                               |
|--------------------------------------------------------------------------------------|-------------------------------------------------------------------------------------------------------------------------------------------------------------------------------------------------------------------------------------------------------------------------------------------------------------------------------------------------------------------------------------------------------------------------------------------------------------------------------------------------------------------------------------------------------------------------------------------------------------------------------------------------------------------------------------|--------|--------------------------------------------------------------------------------------------------------------------------------------------------|---------------------------------------------------------------------------------------------------------------------------------------------------------------|
|                                                                                      | Enhanced Brief lifestyle counselling: same components as group 1 plus a choice of meal replacements or weight loss medication.                                                                                                                                                                                                                                                                                                                                                                                                                                                                                                                                                      |        | enhanced:<br>76.7±27%.                                                                                                                           |                                                                                                                                                               |
| <b>Westland (2020)<br/>The Netherlands</b>                                           | Activate Intervention: four primary care nurse-led physical activity behaviour change consultations within a 3-month period (weeks 1, 2, 6 & 12) with a duration of 30 mins then three sessions of 20 mins plus a workbook.                                                                                                                                                                                                                                                                                                                                                                                                                                                         | 4      | 74% patients attended ≥3 consultations.                                                                                                          | Usual care according to the Dutch guidelines for CVD risk management.                                                                                         |
| <b>Writing Group for the Activity Counselling Trial Research Group (2001)<br/>US</b> | Group 1) Staff Assistance: physician advice (2-4 mins) & written educational materials, health educator showed 17 min video on ACT in a 30-40 min session, interactive mail (monthly newsletter with mail back card for reporting weekly PA, educator replied), pedometer with log, health educator behavioural counselling (10-15 mins) at naturally occurring physician visits, and phone call after 1 week (5-10 mins). Group 2) Staff Counselling: all assistance group plus regular (~15 calls) phone counselling (one per week for 2 weeks, biweekly for 6 weeks then monthly for 1st year then negotiated frequency in 2nd year) & weekly behavioural classes (1 hour each). | 3 & 44 | Assistance:<br>mean 22 contacts totalling 3 hours.<br>Counselling:<br>mean 44 contacts totalling 9 hours for women & 38 totally 6 hours for men. | Usual care: physician advice & written educational materials consistent with national recommendations for physician counselling.                              |
| <b>Yates (2017)<br/>UK</b>                                                           | Walking away from type 2 diabetes: 3-year study with one 3 hour structured educational programme designed to promote physical activity and a healthy lifestyle delivered by trained health educators (primary care health professionals), provision of a pedometer, annual group-based maintenance workshops with health educators (two workshops of 2-3 hours each) and received telephone contact halfway between annual sessions to maintain motivation (x3 calls).                                                                                                                                                                                                              | 6      | 77% attended initial session, 59% attended initial and ≥1 refresher, 41% attended all sessions.                                                  | Sent standardized booklet detailing information on Type 2 diabetes mellitus risk and how PA and lifestyle change can be used to prevent or delay the disease. |

**Supplementary Figure 1: MVPA minutes/week by country**

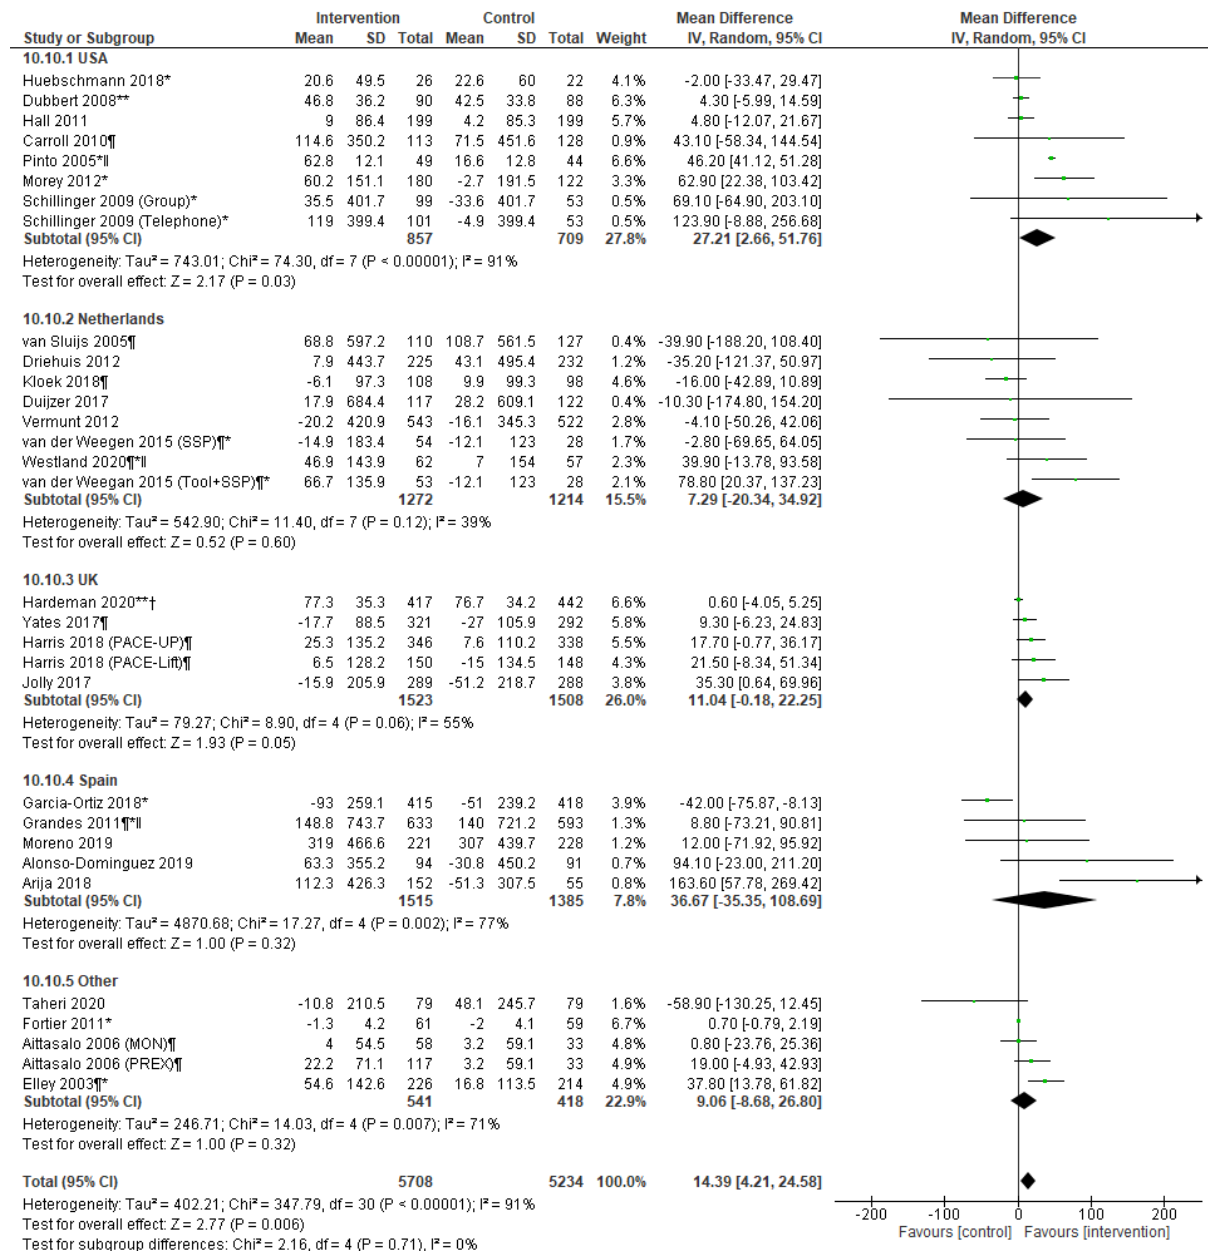

\*Intention to treat analysis ¶Cluster randomised controlled trial \*\*Follow-up values †Geometric means

||Adjusted means

Other countries included: Qatar (Taheri 2020), Canada (Fortier 2011), Finland (Aittasalo), New Zealand (Elley 2003).

## Supplementary Figure 2: MVPA minutes/week by follow-up length

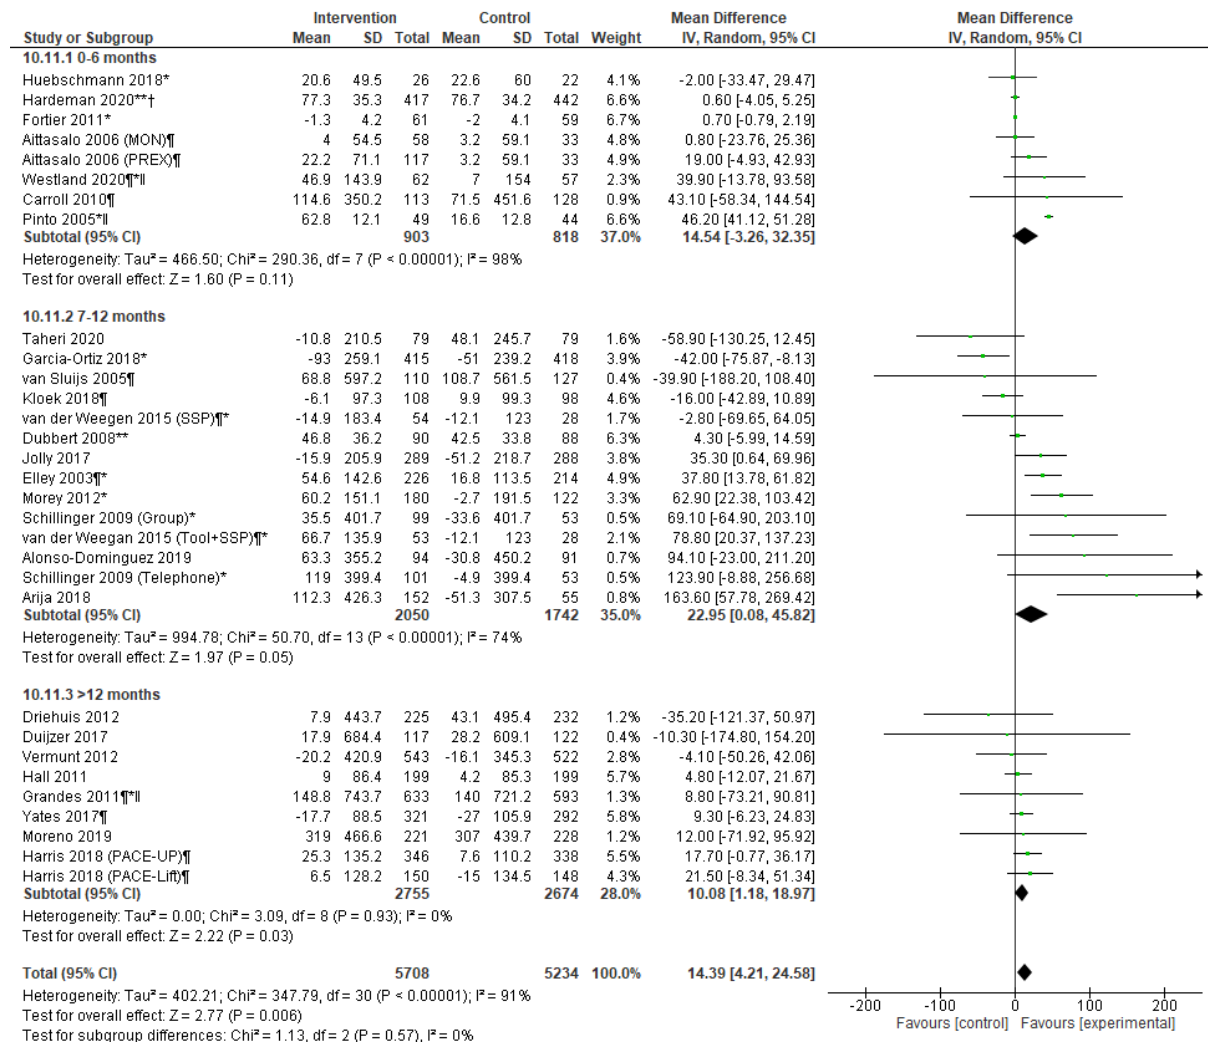

\*Intention to treat analysis ¶Cluster randomised controlled trial \*\*Follow-up values †Geometric means  
‡Adjusted means

**Supplementary Figure 3: Proportion of participants meeting MVPA guidelines according to the number of contacts participants received with an intervenor**

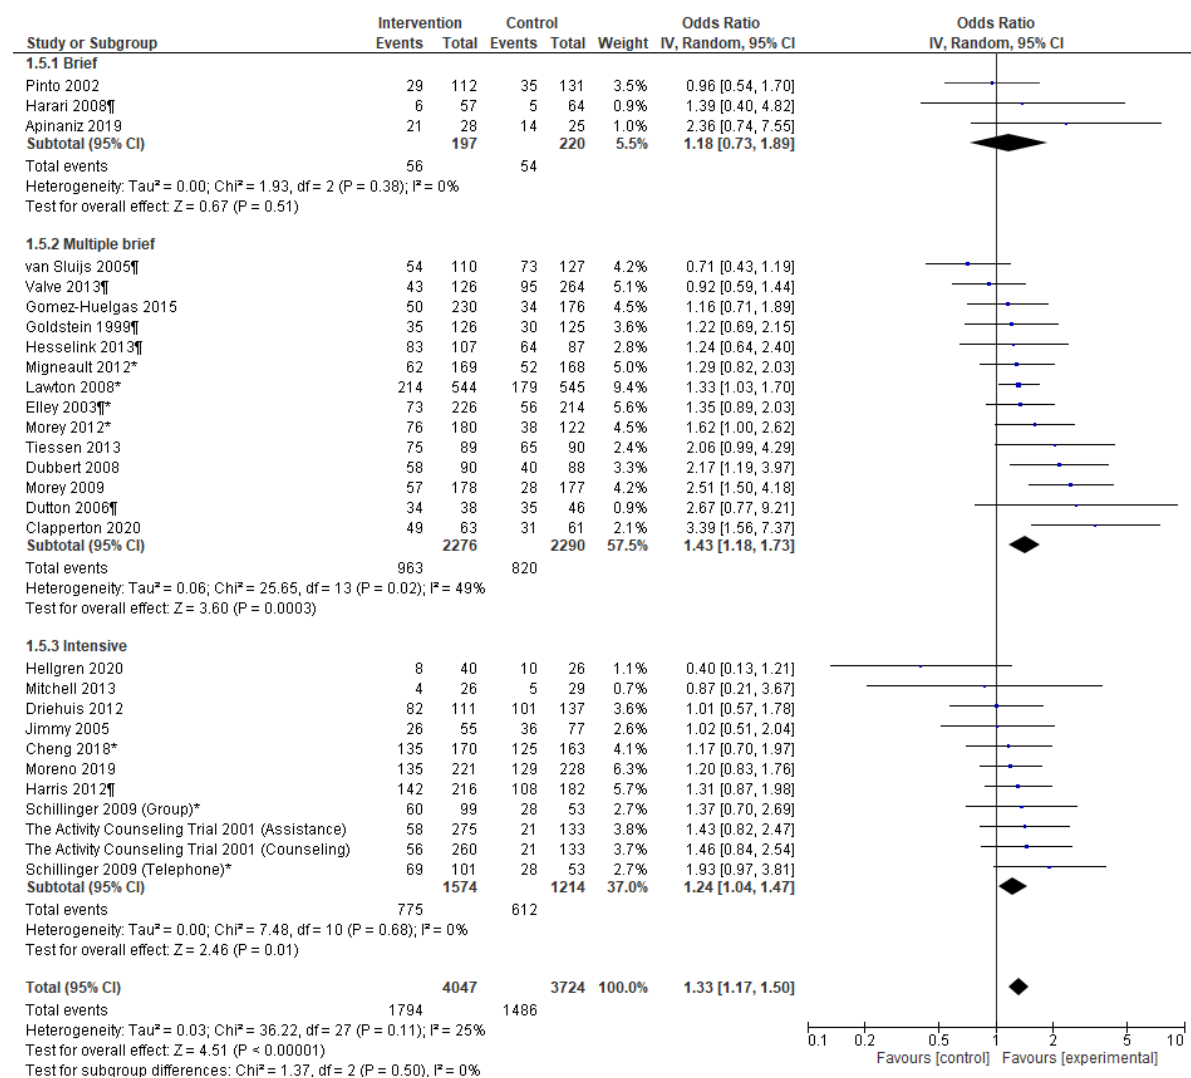

\*Intention to treat analysis ¶Cluster randomised controlled trial

**Supplementary Figure 4: Total physical activity (i.e., all intensities of physical activity)**

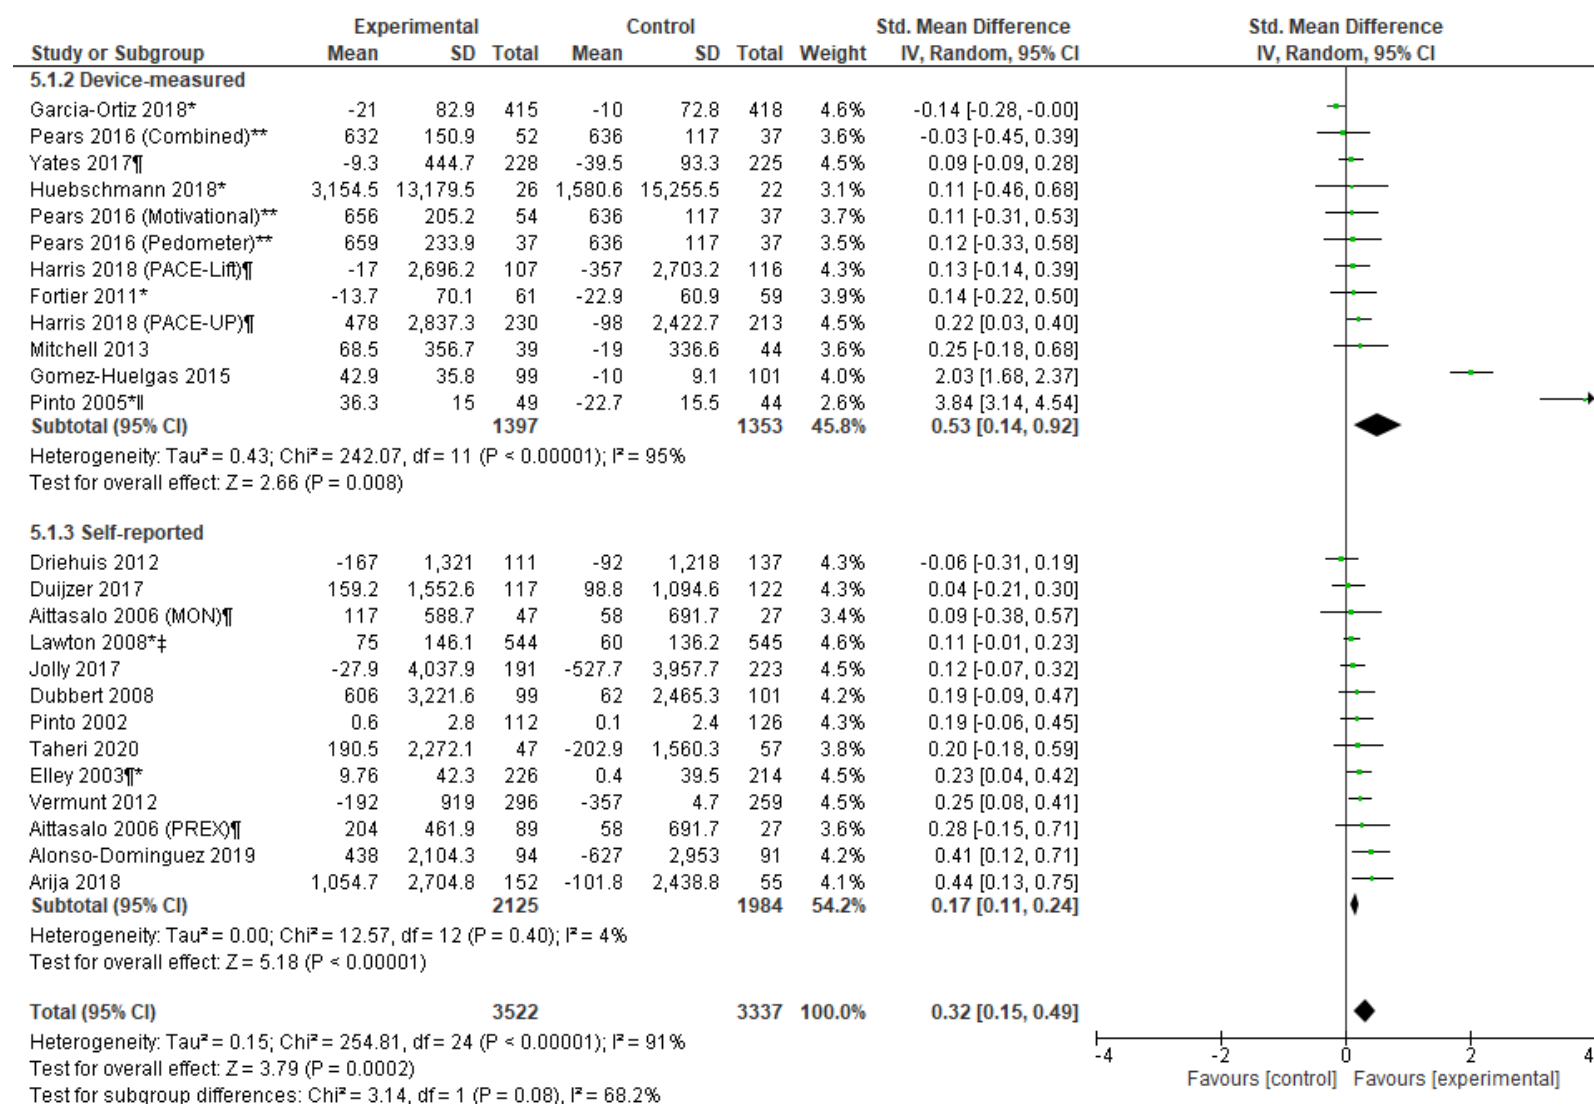

\*Intention to treat analysis ¶Cluster randomised controlled trial ‡Medians \*\*Follow-up values †Adjusted means

**Supplementary Figure 5: Sedentary time minutes per day**

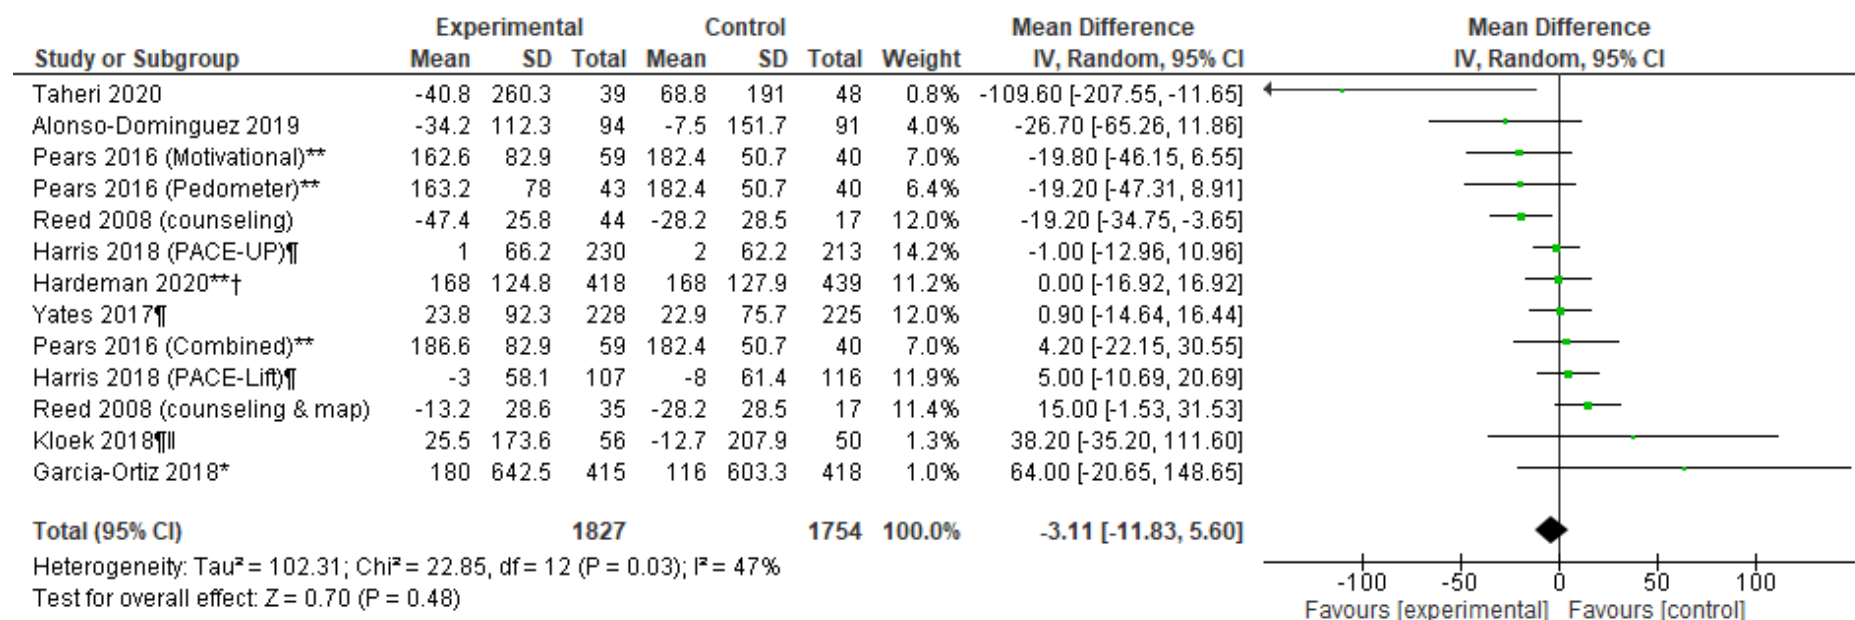

\*Intention to treat analysis ¶Cluster randomised controlled trial \*\*Follow-up values †Geometric means ‡Adjusted means

Supplementary Figure 6: Weight (kg)

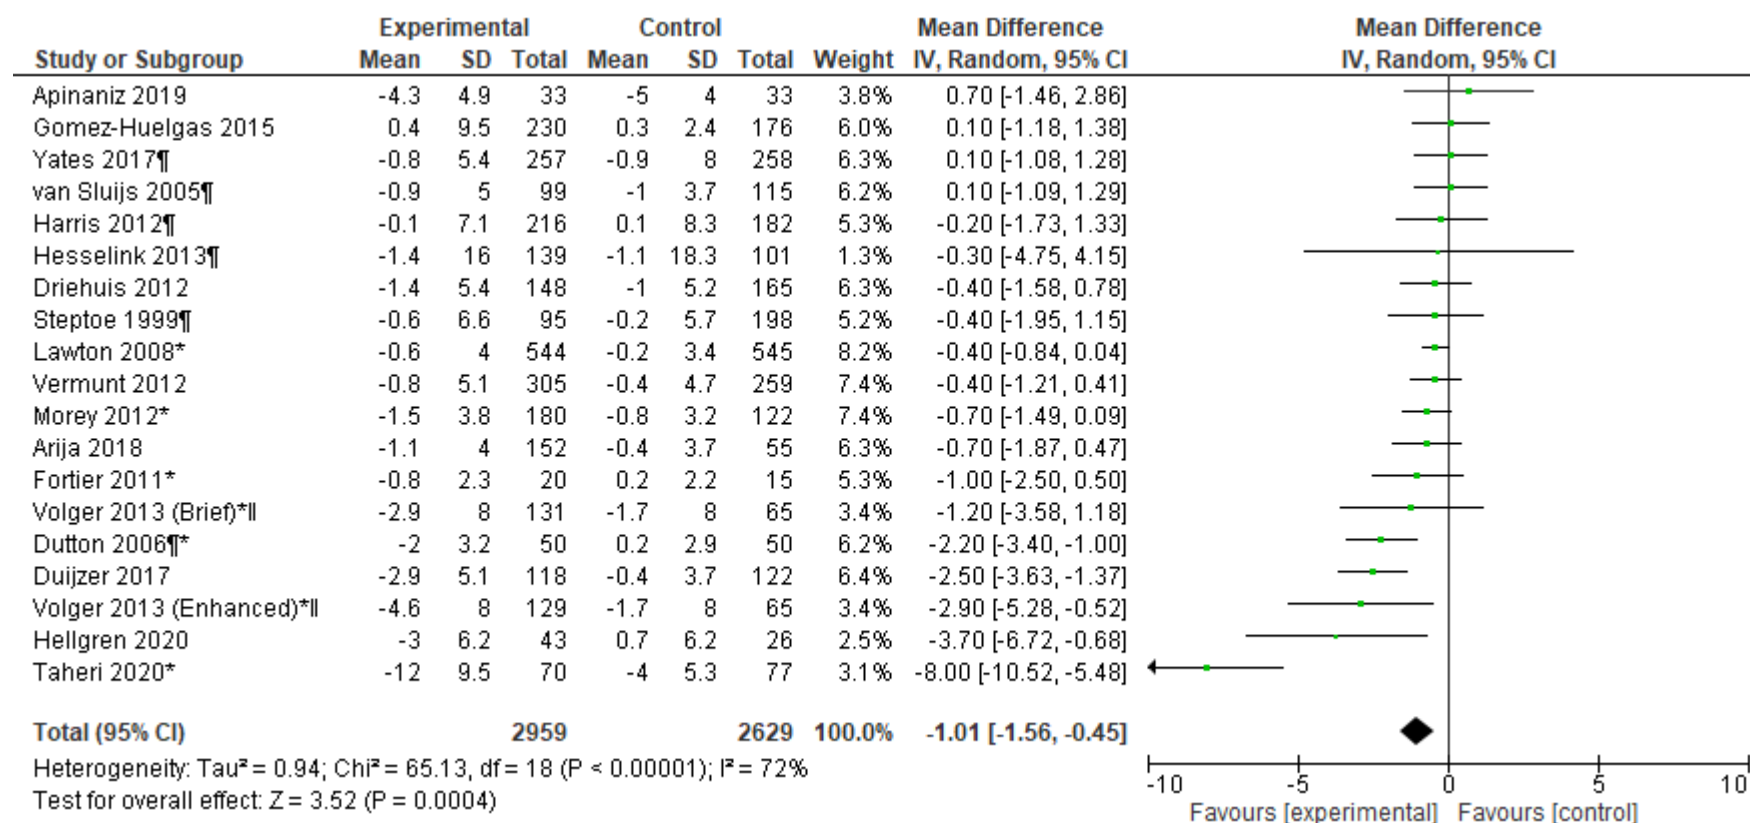

\*Intention to treat analysis ¶Cluster randomised controlled trial ||Adjusted means



Supplementary Figure 7: Body Mass Index (kg/m<sup>2</sup>)

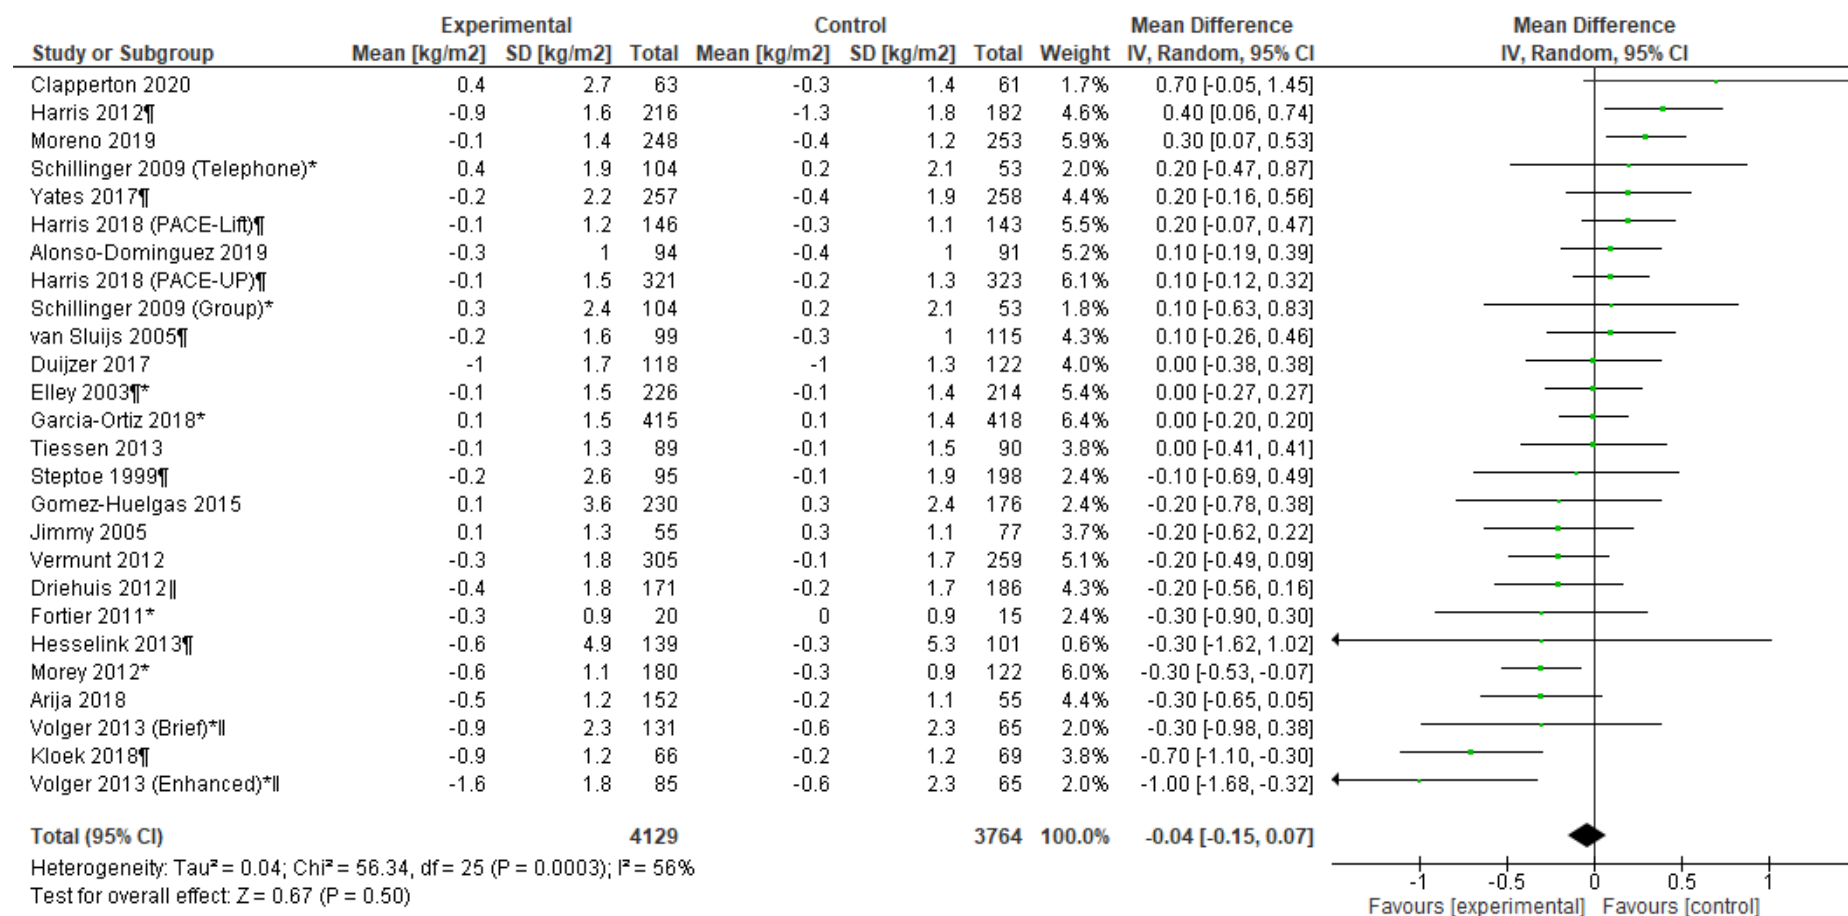

\*Intention to treat analysis ¶Cluster randomised controlled trial ||Adjusted means

**Supplementary Figure 8: Risk of bias assessments**

| year | <u>Study ID</u>                    | <u>D1</u> | <u>D2</u> | <u>D3</u> | <u>D4</u> | <u>D5</u> | <u>Overall</u> |                                               |
|------|------------------------------------|-----------|-----------|-----------|-----------|-----------|----------------|-----------------------------------------------|
| 1999 | Goldstein 1999                     |           |           |           |           |           |                | Low risk                                      |
| 2001 | The Activity Counseling Trial 2001 |           |           |           |           |           |                | Some concerns                                 |
| 2002 | Pinto 2002                         |           |           |           |           |           |                | High risk                                     |
| 2003 | Elley 2003                         |           |           |           |           |           |                |                                               |
| 2005 | Jimmy 2005                         |           |           |           |           |           |                | D1 Randomisation process                      |
| 2005 | Pinto 2005                         |           |           |           |           |           |                | D2 Deviations from the intended interventions |
| 2005 | van Sluijs 2005                    |           |           |           |           |           |                | D3 Missing outcome data                       |
| 2006 | Aittasalo 2006                     |           |           |           |           |           |                | D4 Measurement of the outcome                 |
| 2006 | Dutton 2006                        |           |           |           |           |           |                | D5 Selection of the reported result           |
| 2008 | Dubbert 2008                       |           |           |           |           |           |                |                                               |
| 2008 | Harari 2008                        |           |           |           |           |           |                |                                               |
| 2008 | Lawton 2008                        |           |           |           |           |           |                |                                               |
| 2009 | Morey 2009                         |           |           |           |           |           |                |                                               |
| 2009 | Schillinger 2009                   |           |           |           |           |           |                |                                               |
| 2010 | Carroll 2010                       |           |           |           |           |           |                |                                               |
| 2011 | Fortier 2011                       |           |           |           |           |           |                |                                               |
| 2011 | Grandes 2011                       |           |           |           |           |           |                |                                               |
| 2012 | Driehuis 2012                      |           |           |           |           |           |                |                                               |
| 2012 | Harris 2012                        |           |           |           |           |           |                |                                               |
| 2012 | Migneault 2012                     |           |           |           |           |           |                |                                               |
| 2012 | Morey 2012                         |           |           |           |           |           |                |                                               |
| 2012 | Vermunt 2012                       |           |           |           |           |           |                |                                               |
| 2013 | Hesselink 2013                     |           |           |           |           |           |                |                                               |
| 2013 | Mitchell 2013                      |           |           |           |           |           |                |                                               |

|      |                         |   |   |   |   |   |   |
|------|-------------------------|---|---|---|---|---|---|
| 2013 | Tiessen 2013            | + | + | + | ! | ! | ! |
| 2013 | Valve 2013              | ! | + | + | ! | ! | ! |
| 2015 | Gomez-Huelgas 2015      | ! | ! | - | ! | ! | - |
| 2015 | van der Weegen 2015     | + | + | + | + | + | + |
| 2017 | Duijzer 2017            | + | + | + | ! | + | ! |
| 2017 | Jolly 2017              | + | + | ! | + | + | ! |
| 2017 | Yates 2017              | + | + | - | + | + | - |
| 2018 | Arija 2018              | + | + | + | ! | ! | ! |
| 2018 | Cheng 2018              | + | + | + | - | + | - |
| 2018 | Garcia-Ortiz 2018       | + | + | + | + | + | + |
| 2018 | Harris 2018 (PACE-Lift) | + | + | + | + | ! | ! |
| 2018 | Harris 2018 (PACE-UP)   | + | + | - | + | ! | - |
| 2018 | Huebschmann 2018        | + | + | + | + | ! | ! |
| 2018 | Kloek 2018              | + | + | + | + | + | + |
| 2019 | Alonso-Dominguez 2019   | ! | + | + | ! | + | ! |
| 2019 | Apinaniz 2019           | + | + | - | ! | ! | - |
| 2019 | Moreno 2019             | ! | + | + | ! | + | ! |
| 2020 | Clapperton 2020         | + | + | + | ! | ! | ! |
| 2020 | Hardeman 2020           | + | + | + | + | + | + |
| 2020 | Hellgren 2020           | ! | + | - | ! | ! | - |
| 2020 | Taheri 2020             | + | + | - | ! | + | - |
| 2020 | Westland 2020           | + | + | + | + | + | + |

**Supplementary Figure 9: Funnel plot for MVPA minutes per week outcome**

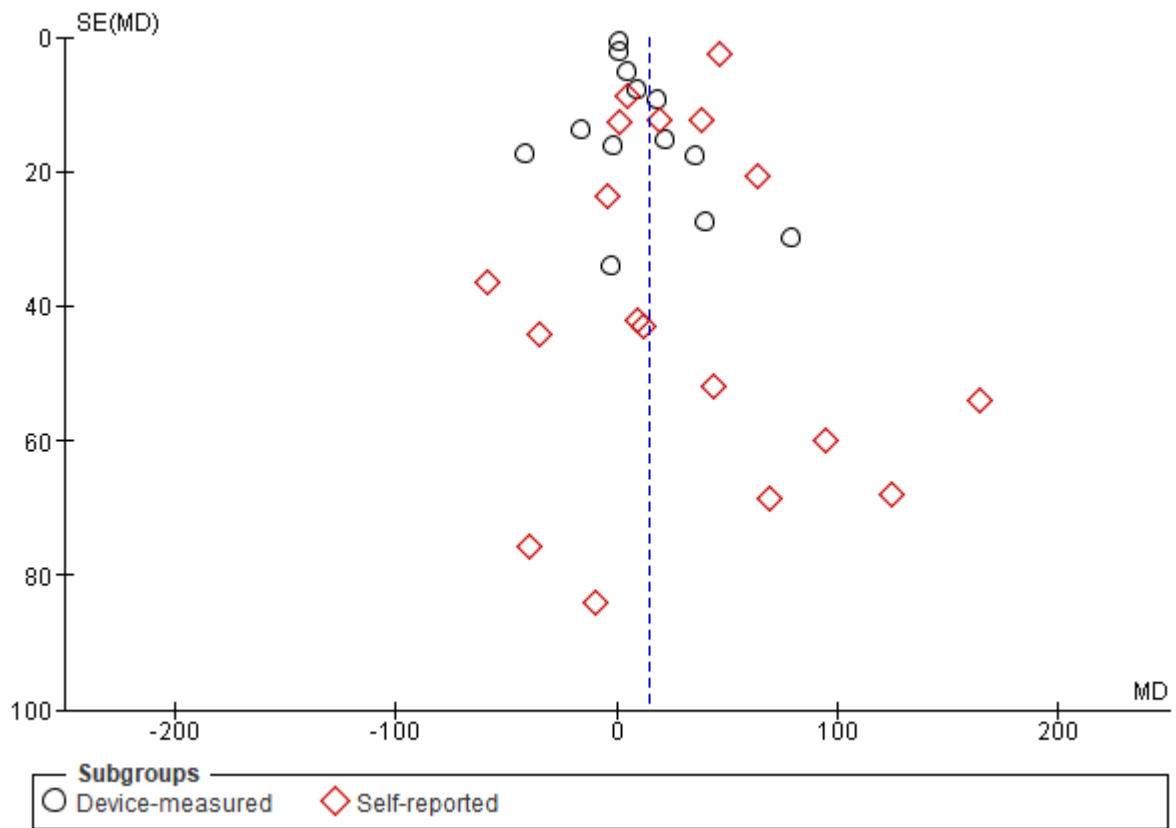

**Supplementary Figure 10: Funnel plot for proportion meeting MVPA guidelines outcome**

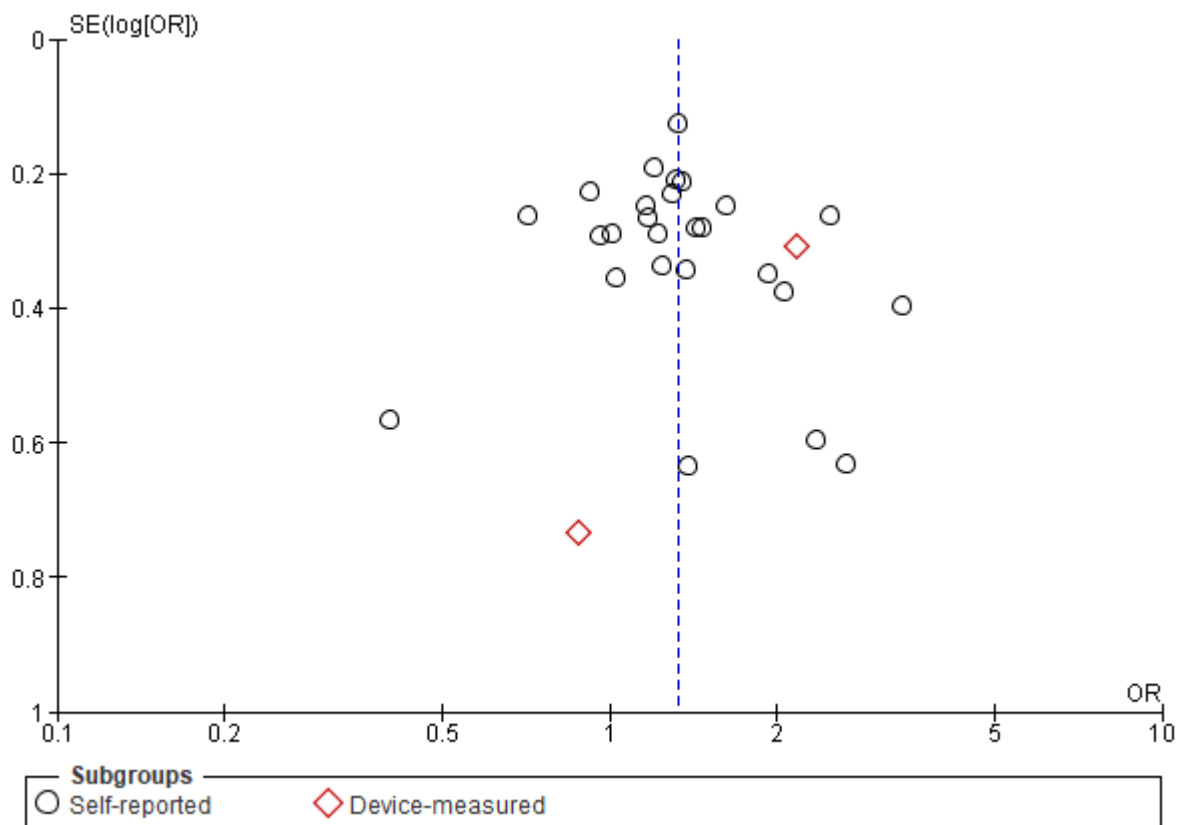

Supplement: ketv068465.ww.pdf [file ketv068465.ww.pdf]
